# Supplementary material for: Application of a modern theoretical approach to the study of the interaction of KR-12 peptides derived from human cathelicidins with Cu(ii) ions
Source: Royal Society of Chemistry journal article supplement (doi:10.1039/d4dt01027b), 2024-01-01
Supplement: d4dt01027b1.pdf [file d4dt01027b1.pdf]

**Table S1.** Cartesian coordinates (in Å) of GFN2-xTB/ALPB optimized structures of KR-12-Cu(II) (Cl<sup>-</sup> anions are omitted).

| System | Coordinates   |               |              |              |
|--------|---------------|---------------|--------------|--------------|
| 1      | Cu            | 4.604269000   | -1.921542000 | -3.130345000 |
|        | N             | -5.039230000  | -5.594747000 | -0.908345000 |
|        | C             | -4.715791000  | -4.765547000 | 0.276911000  |
|        | C             | -4.809626000  | -3.288299000 | -0.103599000 |
|        | O             | -4.109216000  | -2.435388000 | 0.432257000  |
|        | C             | -3.318671000  | -5.221587000 | 0.728188000  |
|        | C             | -2.724664000  | -4.596921000 | 1.994007000  |
|        | C             | -1.615005000  | -5.527835000 | 2.491614000  |
|        | C             | -0.771891000  | -4.924101000 | 3.607537000  |
|        | N             | 0.262011000   | -5.907923000 | 4.005959000  |
|        | H             | -5.454585000  | -4.951086000 | 1.063946000  |
|        | H             | -2.632459000  | -5.073918000 | -0.104620000 |
|        | H             | -3.405481000  | -6.294772000 | 0.906137000  |
|        | H             | -2.310518000  | -3.619899000 | 1.766660000  |
|        | H             | -3.503004000  | -4.481391000 | 2.747632000  |
|        | H             | -0.973690000  | -5.762477000 | 1.649465000  |
|        | H             | -2.083928000  | -6.448157000 | 2.839421000  |
|        | H             | -1.420936000  | -4.698086000 | 4.450302000  |
|        | H             | -0.292633000  | -4.019097000 | 3.251607000  |
|        | H             | 1.143922000   | -5.844143000 | 3.464030000  |
|        | H             | 0.531767000   | -5.807974000 | 4.982075000  |
|        | H             | -0.104497000  | -6.853183000 | 3.894286000  |
|        | H             | -6.030567000  | -5.537096000 | -1.219905000 |
|        | H             | -4.440999000  | -5.266668000 | -1.688714000 |
|        | H             | -4.830457000  | -6.578276000 | -0.722681000 |
|        | N             | -5.725203000  | -2.981229000 | -1.027095000 |
|        | C             | -5.680441000  | -1.726108000 | -1.751834000 |
|        | C             | -5.693221000  | -0.509792000 | -0.827607000 |
|        | O             | -4.976215000  | 0.468090000  | -1.016983000 |
|        | C             | -6.863113000  | -1.627822000 | -2.718971000 |
|        | C             | -6.665712000  | -0.490865000 | -3.719885000 |
|        | C             | -7.851278000  | -0.369726000 | -4.679918000 |
|        | N             | -9.053275000  | 0.096810000  | -4.015876000 |
|        | C             | -9.353265000  | 1.370529000  | -3.763759000 |
|        | N             | -8.507248000  | 2.359820000  | -4.033156000 |
|        | N             | -10.471269000 | 1.663817000  | -3.098768000 |
|        | H             | -6.381945000  | -3.671800000 | -1.381078000 |
|        | H             | -4.751816000  | -1.687821000 | -2.337803000 |
|        | H             | -6.951133000  | -2.576643000 | -3.251934000 |
|        | H             | -7.786052000  | -1.476691000 | -2.157107000 |
|        | H             | -6.532987000  | 0.452863000  | -3.190128000 |
|        | H             | -5.767230000  | -0.678800000 | -4.308468000 |
| H      | -8.072200000  | -1.346016000  | -5.113333000 |              |
| H      | -7.604061000  | 0.307086000   | -5.501132000 |              |
| H      | -9.711267000  | -0.603988000  | -3.713703000 |              |
| H      | -7.715506000  | 2.200934000   | -4.633825000 |              |
| H      | -8.908727000  | 3.292432000   | -4.026604000 |              |
| H      | -10.761844000 | 2.636027000   | -3.134209000 |              |
| H      | -11.198267000 | 0.974974000   | -3.002393000 |              |
| N      | -6.556743000  | -0.597997000  | 0.185719000  |              |

|  |   |               |              |              |
|--|---|---------------|--------------|--------------|
|  | C | -6.789467000  | 0.475918000  | 1.132364000  |
|  | C | -5.459863000  | 0.979786000  | 1.707340000  |
|  | O | -5.308242000  | 2.160924000  | 2.023802000  |
|  | C | -7.711755000  | -0.036744000 | 2.259747000  |
|  | C | -7.737785000  | 0.934571000  | 3.437754000  |
|  | C | -9.129887000  | -0.259153000 | 1.712814000  |
|  | C | -9.965034000  | -1.181609000 | 2.595823000  |
|  | H | -7.140217000  | -1.419889000 | 0.254338000  |
|  | H | -7.270608000  | 1.326983000  | 0.632295000  |
|  | H | -7.316490000  | -0.996918000 | 2.606946000  |
|  | H | -9.087593000  | -0.698800000 | 0.714584000  |
|  | H | -9.634826000  | 0.704651000  | 1.618896000  |
|  | H | -10.953801000 | -1.321696000 | 2.163192000  |
|  | H | -9.497528000  | -2.158840000 | 2.689539000  |
|  | H | -10.099496000 | -0.767689000 | 3.591600000  |
|  | H | -8.450472000  | 0.598638000  | 4.185175000  |
|  | H | -6.764004000  | 1.007933000  | 3.912137000  |
|  | H | -8.037240000  | 1.926155000  | 3.106680000  |
|  | N | -4.544546000  | 0.044341000  | 1.895987000  |
|  | C | -3.244317000  | 0.253571000  | 2.501648000  |
|  | C | -2.204200000  | 0.555238000  | 1.412696000  |
|  | O | -1.545675000  | 1.599306000  | 1.437307000  |
|  | C | -2.943215000  | -1.000330000 | 3.346602000  |
|  | C | -3.874063000  | -1.024138000 | 4.559503000  |
|  | C | -1.488251000  | -1.065503000 | 3.786556000  |
|  | H | -4.700318000  | -0.892695000 | 1.534179000  |
|  | H | -3.299020000  | 1.145887000  | 3.133050000  |
|  | H | -3.169311000  | -1.867489000 | 2.723612000  |
|  | H | -1.369646000  | -1.915562000 | 4.445861000  |
|  | H | -0.845432000  | -1.167636000 | 2.923513000  |
|  | H | -1.223282000  | -0.160856000 | 4.326695000  |
|  | H | -3.759181000  | -1.955463000 | 5.104367000  |
|  | H | -4.917367000  | -0.933879000 | 4.265268000  |
|  | H | -3.648837000  | -0.204702000 | 5.239327000  |
|  | N | -2.076229000  | -0.388250000 | 0.482387000  |
|  | C | -1.234205000  | -0.270854000 | -0.696594000 |
|  | C | -1.211594000  | 1.155419000  | -1.242182000 |
|  | O | -0.152881000  | 1.700016000  | -1.584564000 |
|  | C | -1.741584000  | -1.179788000 | -1.824400000 |
|  | C | -1.566629000  | -2.668781000 | -1.505404000 |
|  | C | -2.175340000  | -3.495429000 | -2.618544000 |
|  | N | -1.502174000  | -3.488958000 | -3.768223000 |
|  | O | -3.209085000  | -4.146793000 | -2.463601000 |
|  | H | -2.732501000  | -1.167884000 | 0.483503000  |
|  | H | -0.198472000  | -0.537093000 | -0.454282000 |
|  | H | -1.188574000  | -0.935352000 | -2.733758000 |
|  | H | -2.792051000  | -0.949766000 | -2.005550000 |
|  | H | -0.508724000  | -2.901225000 | -1.446178000 |
|  | H | -2.064189000  | -2.915376000 | -0.571373000 |
|  | H | -1.880789000  | -3.968012000 | -4.568687000 |
|  | H | -0.699742000  | -2.890132000 | -3.917851000 |
|  | N | -2.399400000  | 1.739370000  | -1.323408000 |
|  | C | -2.637106000  | 3.129922000  | -1.662540000 |
|  | C | -1.377720000  | 3.977793000  | -1.445859000 |

|  |   |              |              |              |
|--|---|--------------|--------------|--------------|
|  | O | -0.929129000 | 4.685536000  | -2.344152000 |
|  | C | -3.802536000 | 3.590230000  | -0.778165000 |
|  | C | -4.144950000 | 5.070811000  | -0.912185000 |
|  | C | -5.420713000 | 5.393435000  | -0.115616000 |
|  | N | -5.360491000 | 4.868497000  | 1.229959000  |
|  | C | -4.730436000 | 5.407794000  | 2.269989000  |
|  | N | -4.345950000 | 6.681752000  | 2.284989000  |
|  | N | -4.503056000 | 4.633768000  | 3.323240000  |
|  | H | -3.248161000 | 1.201023000  | -1.146581000 |
|  | H | -2.891653000 | 3.233424000  | -2.726099000 |
|  | H | -4.672684000 | 2.989860000  | -1.050048000 |
|  | H | -3.541570000 | 3.368974000  | 0.257201000  |
|  | H | -4.307522000 | 5.329487000  | -1.959360000 |
|  | H | -3.309366000 | 5.677122000  | -0.558371000 |
|  | H | -6.277274000 | 4.929479000  | -0.606554000 |
|  | H | -5.594524000 | 6.470735000  | -0.107717000 |
|  | H | -5.544180000 | 3.869740000  | 1.322257000  |
|  | H | -4.531890000 | 7.290272000  | 1.509062000  |
|  | H | -3.932811000 | 7.078425000  | 3.110263000  |
|  | H | -4.777798000 | 3.662589000  | 3.266449000  |
|  | H | -4.144675000 | 5.007300000  | 4.184171000  |
|  | N | -0.887894000 | 3.950431000  | -0.197214000 |
|  | C | 0.395016000  | 4.533527000  | 0.133885000  |
|  | C | 1.485411000  | 3.464925000  | 0.272750000  |
|  | O | 2.598105000  | 3.583876000  | -0.255442000 |
|  | C | 0.310325000  | 5.348788000  | 1.444859000  |
|  | C | 1.674107000  | 5.954155000  | 1.771437000  |
|  | C | -0.767948000 | 6.429813000  | 1.308230000  |
|  | C | -0.948896000 | 7.262765000  | 2.572945000  |
|  | H | -1.263359000 | 3.261148000  | 0.452108000  |
|  | H | 0.679492000  | 5.188366000  | -0.697488000 |
|  | H | 0.025791000  | 4.665057000  | 2.249764000  |
|  | H | -0.508183000 | 7.085264000  | 0.472543000  |
|  | H | -1.711909000 | 5.942488000  | 1.062859000  |
|  | H | -1.761523000 | 7.970250000  | 2.436149000  |
|  | H | -1.162244000 | 6.622407000  | 3.423148000  |
|  | H | -0.053895000 | 7.838649000  | 2.792094000  |
|  | H | 1.675269000  | 6.399328000  | 2.761413000  |
|  | H | 1.933225000  | 6.724311000  | 1.046163000  |
|  | H | 2.458092000  | 5.201979000  | 1.739311000  |
|  | N | 1.177731000  | 2.448366000  | 1.074851000  |
|  | C | 2.169806000  | 1.489352000  | 1.515552000  |
|  | C | 2.922738000  | 0.861663000  | 0.362382000  |
|  | O | 4.062191000  | 0.405036000  | 0.549070000  |
|  | C | 1.506039000  | 0.403520000  | 2.374002000  |
|  | C | 2.511090000  | -0.383516000 | 3.220933000  |
|  | C | 1.833491000  | -1.601509000 | 3.845889000  |
|  | C | 2.774364000  | -2.421889000 | 4.718604000  |
|  | N | 2.070113000  | -3.675527000 | 5.047508000  |
|  | H | 0.212969000  | 2.273753000  | 1.357438000  |
|  | H | 2.929474000  | 2.019149000  | 2.107601000  |
|  | H | 0.962879000  | -0.263013000 | 1.707728000  |
|  | H | 0.794968000  | 0.904905000  | 3.028984000  |
|  | H | 3.350685000  | -0.693351000 | 2.600638000  |

|  |   |              |              |              |
|--|---|--------------|--------------|--------------|
|  | H | 2.915964000  | 0.276585000  | 3.990877000  |
|  | H | 1.005486000  | -1.244246000 | 4.450818000  |
|  | H | 1.478585000  | -2.246028000 | 3.048254000  |
|  | H | 3.048741000  | -1.867175000 | 5.615178000  |
|  | H | 3.686033000  | -2.660929000 | 4.178186000  |
|  | H | 2.591161000  | -4.216761000 | 5.735408000  |
|  | H | 1.135426000  | -3.456700000 | 5.395610000  |
|  | H | 2.060905000  | -4.263719000 | 4.193547000  |
|  | N | 2.288293000  | 0.710192000  | -0.799805000 |
|  | C | 2.987960000  | 0.132214000  | -1.919075000 |
|  | C | 4.351003000  | 0.746271000  | -2.194051000 |
|  | O | 5.206030000  | 0.075257000  | -2.815911000 |
|  | C | 2.160365000  | 0.123619000  | -3.210905000 |
|  | C | 1.817859000  | -1.300321000 | -3.699329000 |
|  | O | 2.713694000  | -2.201592000 | -3.677717000 |
|  | O | 0.664978000  | -1.517912000 | -4.073307000 |
|  | H | 1.381494000  | 1.158954000  | -0.996001000 |
|  | H | 3.239680000  | -0.915760000 | -1.673270000 |
|  | H | 2.724314000  | 0.587525000  | -4.024194000 |
|  | H | 1.236727000  | 0.688518000  | -3.081578000 |
|  | N | 4.620948000  | 1.968949000  | -1.748355000 |
|  | C | 5.972107000  | 2.491901000  | -1.803402000 |
|  | C | 6.989211000  | 1.466686000  | -1.250836000 |
|  | O | 8.073332000  | 1.265660000  | -1.798596000 |
|  | C | 6.045354000  | 3.775862000  | -0.964086000 |
|  | C | 7.471381000  | 4.227152000  | -0.822640000 |
|  | C | 8.114250000  | 4.870349000  | -1.872124000 |
|  | C | 8.184003000  | 3.965937000  | 0.339879000  |
|  | C | 9.512470000  | 4.334873000  | 0.450666000  |
|  | C | 10.146459000 | 4.970337000  | -0.602949000 |
|  | C | 9.442931000  | 5.239274000  | -1.764766000 |
|  | H | 3.906267000  | 2.538375000  | -1.287003000 |
|  | H | 6.273175000  | 2.685134000  | -2.840966000 |
|  | H | 5.621681000  | 3.571561000  | 0.019206000  |
|  | H | 5.446173000  | 4.544666000  | -1.453597000 |
|  | H | 7.572907000  | 5.079030000  | -2.783782000 |
|  | H | 7.697837000  | 3.462622000  | 1.161968000  |
|  | H | 10.059498000 | 4.120871000  | 1.357006000  |
|  | H | 11.185873000 | 5.252048000  | -0.522036000 |
|  | H | 9.933806000  | 5.732685000  | -2.590850000 |
|  | N | 6.605304000  | 0.919319000  | -0.097757000 |
|  | C | 7.352240000  | -0.035620000 | 0.695993000  |
|  | C | 7.195231000  | -1.482192000 | 0.209084000  |
|  | O | 8.194426000  | -2.223626000 | 0.073564000  |
|  | C | 6.839397000  | 0.088600000  | 2.143366000  |
|  | C | 7.241857000  | -1.051207000 | 3.086362000  |
|  | C | 8.753657000  | -1.077934000 | 3.307520000  |
|  | C | 6.497207000  | -0.900742000 | 4.412948000  |
|  | H | 5.619704000  | 1.001130000  | 0.172928000  |
|  | H | 8.420376000  | 0.197565000  | 0.605549000  |
|  | H | 7.205684000  | 1.032761000  | 2.549269000  |
|  | H | 5.750905000  | 0.123896000  | 2.087949000  |
|  | H | 6.970667000  | -2.004840000 | 2.614617000  |
|  | H | 9.028202000  | -1.835830000 | 4.040386000  |

|   |    |              |              |              |
|---|----|--------------|--------------|--------------|
|   | H  | 9.117926000  | -0.113135000 | 3.653870000  |
|   | H  | 9.271872000  | -1.324599000 | 2.377380000  |
|   | H  | 6.722215000  | -1.742145000 | 5.061450000  |
|   | H  | 6.823614000  | 0.010009000  | 4.907197000  |
|   | H  | 5.429085000  | -0.849465000 | 4.234359000  |
|   | N  | 5.933567000  | -1.904825000 | 0.068703000  |
|   | C  | 5.595559000  | -3.276782000 | -0.304076000 |
|   | C  | 6.315358000  | -3.767014000 | -1.545449000 |
|   | O  | 7.244162000  | -4.692873000 | -1.516927000 |
|   | C  | 4.072023000  | -3.460724000 | -0.454341000 |
|   | C  | 3.187580000  | -2.756441000 | 0.577760000  |
|   | C  | 1.695140000  | -2.921137000 | 0.239254000  |
|   | N  | 1.200247000  | -4.223713000 | 0.613426000  |
|   | C  | 1.108522000  | -5.292321000 | -0.170703000 |
|   | N  | 0.869549000  | -6.453877000 | 0.435275000  |
|   | N  | 1.011426000  | -5.199275000 | -1.505526000 |
|   | H  | 5.203360000  | -1.194321000 | 0.048633000  |
|   | H  | 6.026331000  | -3.893667000 | 0.496596000  |
|   | H  | 3.846857000  | -3.106568000 | -1.474624000 |
|   | H  | 3.900648000  | -4.539385000 | -0.459553000 |
|   | H  | 3.429217000  | -1.700770000 | 0.569606000  |
|   | H  | 3.375902000  | -3.154173000 | 1.570783000  |
|   | H  | 1.135082000  | -2.192833000 | 0.823760000  |
|   | H  | 1.554240000  | -2.699012000 | -0.819098000 |
|   | H  | 1.389925000  | -4.446857000 | 1.598653000  |
|   | H  | 0.798832000  | -7.294347000 | -0.111697000 |
|   | H  | 1.183266000  | -6.533232000 | 1.399424000  |
|   | H  | 0.974706000  | -6.035517000 | -2.060836000 |
|   | H  | 1.329838000  | -4.381021000 | -1.995987000 |
|   | N  | 6.322927000  | -2.797745000 | -2.649242000 |
|   | H  | 6.748794000  | -3.253912000 | -3.453055000 |
|   | H  | 6.924716000  | -1.992614000 | -2.425061000 |
| 2 | Cu | -3.931987000 | -1.861599000 | -1.726242000 |
|   | N  | -6.230990000 | -4.989718000 | 2.067550000  |
|   | C  | -5.002890000 | -4.216109000 | 1.800673000  |
|   | C  | -5.193948000 | -3.138126000 | 0.749400000  |
|   | O  | -4.187223000 | -2.505471000 | 0.376444000  |
|   | C  | -3.879296000 | -5.173117000 | 1.338969000  |
|   | C  | -2.521140000 | -4.882008000 | 1.978349000  |
|   | C  | -1.492485000 | -5.901907000 | 1.488440000  |
|   | C  | -0.089340000 | -5.564017000 | 1.987233000  |
|   | N  | 0.838530000  | -6.638243000 | 1.586570000  |
|   | H  | -4.699829000 | -3.720316000 | 2.729982000  |
|   | H  | -3.786466000 | -5.129157000 | 0.254327000  |
|   | H  | -4.166321000 | -6.190576000 | 1.599773000  |
|   | H  | -2.189091000 | -3.882165000 | 1.717017000  |
|   | H  | -2.612620000 | -4.943320000 | 3.061601000  |
|   | H  | -1.501484000 | -5.915688000 | 0.401375000  |
|   | H  | -1.784212000 | -6.890957000 | 1.840108000  |
|   | H  | -0.119548000 | -5.487393000 | 3.069408000  |
|   | H  | 0.243646000  | -4.631559000 | 1.545392000  |
|   | H  | 1.858975000  | -6.394039000 | 1.572610000  |
|   | H  | 0.738676000  | -7.459447000 | 2.180518000  |

|  |   |               |              |              |
|--|---|---------------|--------------|--------------|
|  | H | 0.629226000   | -6.919246000 | 0.629391000  |
|  | H | -7.088477000  | -4.412411000 | 2.242486000  |
|  | H | -6.468712000  | -5.583608000 | 1.266741000  |
|  | H | -6.091136000  | -5.593629000 | 2.883162000  |
|  | N | -6.404853000  | -2.911041000 | 0.259566000  |
|  | C | -6.561888000  | -2.018271000 | -0.872497000 |
|  | C | -5.965644000  | -0.638043000 | -0.553779000 |
|  | O | -5.013233000  | -0.172993000 | -1.196951000 |
|  | C | -8.020091000  | -1.876724000 | -1.309403000 |
|  | C | -8.081148000  | -1.191857000 | -2.683242000 |
|  | C | -9.311333000  | -0.294414000 | -2.850483000 |
|  | N | -9.171229000  | 0.947619000  | -2.108040000 |
|  | C | -8.413217000  | 1.977118000  | -2.492439000 |
|  | N | -7.586195000  | 1.888210000  | -3.528224000 |
|  | N | -8.339349000  | 3.067946000  | -1.726756000 |
|  | H | -7.261669000  | -3.279734000 | 0.686129000  |
|  | H | -5.981532000  | -2.427233000 | -1.721086000 |
|  | H | -8.479032000  | -2.863613000 | -1.357377000 |
|  | H | -8.579037000  | -1.301024000 | -0.572870000 |
|  | H | -7.192781000  | -0.575639000 | -2.823220000 |
|  | H | -8.090769000  | -1.944304000 | -3.470940000 |
|  | H | -10.201319000 | -0.806020000 | -2.485526000 |
|  | H | -9.471607000  | -0.075704000 | -3.910610000 |
|  | H | -9.799665000  | 1.101992000  | -1.335027000 |
|  | H | -7.708271000  | 1.168084000  | -4.220265000 |
|  | H | -7.187710000  | 2.768116000  | -3.845180000 |
|  | H | -7.938669000  | 3.884170000  | -2.184575000 |
|  | H | -9.055067000  | 3.243734000  | -1.040144000 |
|  | N | -6.527512000  | -0.048459000 | 0.489300000  |
|  | C | -6.220571000  | 1.265418000  | 1.022605000  |
|  | C | -4.782601000  | 1.359314000  | 1.549726000  |
|  | O | -4.243105000  | 2.455281000  | 1.703777000  |
|  | C | -7.231782000  | 1.547984000  | 2.161171000  |
|  | C | -6.902621000  | 2.821819000  | 2.934523000  |
|  | C | -8.657213000  | 1.640400000  | 1.589918000  |
|  | C | -9.709026000  | 1.181940000  | 2.596702000  |
|  | H | -7.261716000  | -0.557065000 | 0.968668000  |
|  | H | -6.332806000  | 2.023380000  | 0.237914000  |
|  | H | -7.190114000  | 0.703241000  | 2.856992000  |
|  | H | -8.749989000  | 1.026030000  | 0.695002000  |
|  | H | -8.858638000  | 2.675101000  | 1.311556000  |
|  | H | -10.713293000 | 1.327996000  | 2.202889000  |
|  | H | -9.594934000  | 0.125259000  | 2.833190000  |
|  | H | -9.640872000  | 1.742140000  | 3.526202000  |
|  | H | -7.686755000  | 3.019580000  | 3.660778000  |
|  | H | -5.968558000  | 2.728660000  | 3.477927000  |
|  | H | -6.840740000  | 3.672914000  | 2.262596000  |
|  | N | -4.192385000  | 0.215318000  | 1.863509000  |
|  | C | -2.861013000  | 0.130214000  | 2.437926000  |
|  | C | -1.814751000  | 0.341047000  | 1.334780000  |
|  | O | -1.107478000  | 1.348946000  | 1.324061000  |
|  | C | -2.729842000  | -1.221277000 | 3.162119000  |
|  | C | -3.656702000  | -1.244364000 | 4.378573000  |
|  | C | -1.289689000  | -1.498275000 | 3.580929000  |

|  |   |              |              |              |
|--|---|--------------|--------------|--------------|
|  | H | -4.632018000 | -0.665764000 | 1.635735000  |
|  | H | -2.735722000 | 0.963534000  | 3.137495000  |
|  | H | -3.049783000 | -1.997932000 | 2.465026000  |
|  | H | -1.250972000 | -2.439145000 | 4.117213000  |
|  | H | -0.639964000 | -1.544055000 | 2.717136000  |
|  | H | -0.932957000 | -0.715560000 | 4.245454000  |
|  | H | -3.601153000 | -2.207385000 | 4.876703000  |
|  | H | -4.691674000 | -1.054886000 | 4.106630000  |
|  | H | -3.362237000 | -0.486373000 | 5.101879000  |
|  | N | -1.741463000 | -0.639918000 | 0.434112000  |
|  | C | -0.793227000 | -0.665876000 | -0.669861000 |
|  | C | -0.720067000 | 0.689388000  | -1.373386000 |
|  | O | 0.348572000  | 1.208218000  | -1.701481000 |
|  | C | -1.149845000 | -1.728010000 | -1.715887000 |
|  | C | -1.332580000 | -3.141117000 | -1.144360000 |
|  | C | -2.185281000 | -3.972868000 | -2.072144000 |
|  | N | -1.809144000 | -5.227008000 | -2.248887000 |
|  | O | -3.248798000 | -3.541064000 | -2.569243000 |
|  | H | -2.450176000 | -1.368748000 | 0.458823000  |
|  | H | 0.215431000  | -0.864984000 | -0.293408000 |
|  | H | -0.355443000 | -1.718215000 | -2.465878000 |
|  | H | -2.062199000 | -1.406170000 | -2.242765000 |
|  | H | -0.370092000 | -3.613652000 | -0.986636000 |
|  | H | -1.877132000 | -3.102270000 | -0.199808000 |
|  | H | -2.333760000 | -5.816146000 | -2.877399000 |
|  | H | -0.896751000 | -5.537184000 | -1.948153000 |
|  | N | -1.906499000 | 1.273078000  | -1.555739000 |
|  | C | -2.105114000 | 2.624869000  | -2.043809000 |
|  | C | -0.879552000 | 3.497845000  | -1.736887000 |
|  | O | -0.359192000 | 4.192152000  | -2.607823000 |
|  | C | -3.365233000 | 3.145686000  | -1.342579000 |
|  | C | -3.724339000 | 4.589550000  | -1.678113000 |
|  | C | -5.030792000 | 4.990031000  | -0.976919000 |
|  | N | -4.935241000 | 4.852925000  | 0.457898000  |
|  | C | -4.630561000 | 5.788174000  | 1.349106000  |
|  | N | -4.690117000 | 7.090576000  | 1.077483000  |
|  | N | -4.332003000 | 5.381545000  | 2.579203000  |
|  | H | -2.760668000 | 0.756411000  | -1.367938000 |
|  | H | -2.219602000 | 2.644279000  | -3.136626000 |
|  | H | -4.196863000 | 2.503069000  | -1.639297000 |
|  | H | -3.196979000 | 3.054587000  | -0.269225000 |
|  | H | -3.866516000 | 4.704278000  | -2.754509000 |
|  | H | -2.911422000 | 5.259777000  | -1.389682000 |
|  | H | -5.830347000 | 4.339582000  | -1.336599000 |
|  | H | -5.299428000 | 6.005943000  | -1.265312000 |
|  | H | -4.785612000 | 3.895710000  | 0.800898000  |
|  | H | -4.945017000 | 7.419403000  | 0.164224000  |
|  | H | -4.523454000 | 7.772582000  | 1.795414000  |
|  | H | -4.189312000 | 4.395405000  | 2.737074000  |
|  | H | -4.109584000 | 6.035462000  | 3.307956000  |
|  | N | -0.509336000 | 3.509584000  | -0.447970000 |
|  | C | 0.696854000  | 4.160704000  | 0.015988000  |
|  | C | 1.849484000  | 3.164529000  | 0.218072000  |
|  | O | 2.979954000  | 3.383591000  | -0.234918000 |

|  |   |              |              |              |
|--|---|--------------|--------------|--------------|
|  | C | 0.418645000  | 4.913957000  | 1.335919000  |
|  | C | 1.697397000  | 5.578553000  | 1.840250000  |
|  | C | -0.702290000 | 5.936550000  | 1.115965000  |
|  | C | -1.116378000 | 6.655211000  | 2.395413000  |
|  | H | -0.924099000 | 2.833842000  | 0.194335000  |
|  | H | 1.014862000  | 4.862953000  | -0.763651000 |
|  | H | 0.086234000  | 4.179653000  | 2.075495000  |
|  | H | -0.372799000 | 6.667109000  | 0.371790000  |
|  | H | -1.565827000 | 5.414790000  | 0.701922000  |
|  | H | -1.955934000 | 7.311770000  | 2.189677000  |
|  | H | -1.392596000 | 5.935590000  | 3.159313000  |
|  | H | -0.305857000 | 7.270800000  | 2.775794000  |
|  | H | 1.553460000  | 5.999429000  | 2.830388000  |
|  | H | 2.004389000  | 6.377158000  | 1.165917000  |
|  | H | 2.517484000  | 4.866548000  | 1.891831000  |
|  | N | 1.555459000  | 2.104728000  | 0.966368000  |
|  | C | 2.547953000  | 1.153828000  | 1.431784000  |
|  | C | 3.443510000  | 0.667037000  | 0.306065000  |
|  | O | 4.603648000  | 0.311444000  | 0.576510000  |
|  | C | 1.853714000  | -0.025137000 | 2.133521000  |
|  | C | 2.817928000  | -0.921028000 | 2.922583000  |
|  | C | 2.177058000  | -2.278197000 | 3.226795000  |
|  | C | 3.181595000  | -3.299248000 | 3.758247000  |
|  | N | 2.634148000  | -4.653843000 | 3.529780000  |
|  | H | 0.583430000  | 1.906385000  | 1.213986000  |
|  | H | 3.223227000  | 1.661261000  | 2.135397000  |
|  | H | 1.355521000  | -0.609396000 | 1.364433000  |
|  | H | 1.108601000  | 0.396152000  | 2.806764000  |
|  | H | 3.729168000  | -1.067946000 | 2.344719000  |
|  | H | 3.113903000  | -0.413347000 | 3.841974000  |
|  | H | 1.382360000  | -2.131011000 | 3.953176000  |
|  | H | 1.773571000  | -2.677719000 | 2.302861000  |
|  | H | 3.372867000  | -3.133723000 | 4.818224000  |
|  | H | 4.134110000  | -3.207920000 | 3.238614000  |
|  | H | 3.124601000  | -5.347981000 | 4.092810000  |
|  | H | 1.638141000  | -4.669699000 | 3.757464000  |
|  | H | 2.805649000  | -4.978750000 | 2.551478000  |
|  | N | 2.917564000  | 0.549778000  | -0.905895000 |
|  | C | 3.702720000  | 0.217413000  | -2.075344000 |
|  | C | 5.108011000  | 0.796946000  | -2.058580000 |
|  | O | 6.059762000  | 0.159769000  | -2.530667000 |
|  | C | 3.019320000  | 0.688959000  | -3.360606000 |
|  | C | 1.969488000  | -0.326003000 | -3.927749000 |
|  | O | 1.762699000  | -1.369647000 | -3.288948000 |
|  | O | 1.422743000  | 0.002026000  | -4.995101000 |
|  | H | 1.951719000  | 0.836870000  | -1.106319000 |
|  | H | 3.812584000  | -0.871584000 | -2.151819000 |
|  | H | 3.760645000  | 0.826751000  | -4.153828000 |
|  | H | 2.515193000  | 1.647046000  | -3.217032000 |
|  | N | 5.255184000  | 2.021939000  | -1.550239000 |
|  | C | 6.561950000  | 2.638176000  | -1.427323000 |
|  | C | 7.603573000  | 1.613644000  | -0.931680000 |
|  | O | 8.724677000  | 1.536028000  | -1.426261000 |
|  | C | 6.474952000  | 3.805426000  | -0.433096000 |



|  |   |              |              |              |
|--|---|--------------|--------------|--------------|
|  | C | 7.838539000  | 4.386185000  | -0.190230000 |
|  | C | 8.403535000  | 5.262964000  | -1.106862000 |
|  | C | 8.573828000  | 4.021235000  | 0.929464000  |
|  | C | 9.848642000  | 4.519877000  | 1.128109000  |
|  | C | 10.404774000 | 5.391422000  | 0.207705000  |
|  | C | 9.678171000  | 5.763145000  | -0.910666000 |
|  | H | 4.454279000  | 2.539504000  | -1.185803000 |
|  | H | 6.920027000  | 2.988189000  | -2.405111000 |
|  | H | 6.055390000  | 3.433261000  | 0.501548000  |
|  | H | 5.803388000  | 4.559685000  | -0.846412000 |
|  | H | 7.842802000  | 5.552234000  | -1.984371000 |
|  | H | 8.148507000  | 3.334401000  | 1.645536000  |
|  | H | 10.414246000 | 4.224255000  | 1.999164000  |
|  | H | 11.402202000 | 5.776842000  | 0.357717000  |
|  | H | 10.108344000 | 6.440093000  | -1.634080000 |
|  | N | 7.187254000  | 0.930376000  | 0.137478000  |
|  | C | 7.877910000  | -0.181877000 | 0.756371000  |
|  | C | 7.625816000  | -1.492839000 | -0.003206000 |
|  | O | 8.564201000  | -2.211860000 | -0.377121000 |
|  | C | 7.370548000  | -0.294631000 | 2.203428000  |
|  | C | 7.703536000  | -1.613097000 | 2.911414000  |
|  | C | 9.211945000  | -1.787684000 | 3.076673000  |
|  | C | 7.000013000  | -1.652302000 | 4.267934000  |
|  | H | 6.186888000  | 0.957881000  | 0.351436000  |
|  | H | 8.955782000  | 0.005607000  | 0.699424000  |
|  | H | 7.793857000  | 0.533134000  | 2.774159000  |
|  | H | 6.286868000  | -0.178838000 | 2.171840000  |
|  | H | 7.348588000  | -2.446609000 | 2.293427000  |
|  | H | 9.438101000  | -2.689429000 | 3.644430000  |
|  | H | 9.652209000  | -0.936134000 | 3.591183000  |
|  | H | 9.696533000  | -1.888717000 | 2.103783000  |
|  | H | 7.170638000  | -2.612243000 | 4.746553000  |
|  | H | 7.401393000  | -0.873008000 | 4.910108000  |
|  | H | 5.934553000  | -1.495085000 | 4.141011000  |
|  | N | 6.349165000  | -1.828181000 | -0.164088000 |
|  | C | 5.990738000  | -3.135628000 | -0.682774000 |
|  | C | 6.864255000  | -3.491476000 | -1.878760000 |
|  | O | 7.408655000  | -4.596698000 | -1.992758000 |
|  | C | 4.518972000  | -3.261218000 | -1.092368000 |
|  | C | 3.556651000  | -2.835069000 | 0.014069000  |
|  | C | 2.099116000  | -2.975860000 | -0.432422000 |
|  | N | 1.758803000  | -4.377823000 | -0.568707000 |
|  | C | 1.702806000  | -5.035949000 | -1.721493000 |
|  | N | 1.627906000  | -6.376847000 | -1.617819000 |
|  | N | 1.381613000  | -4.435291000 | -2.873519000 |
|  | H | 5.615914000  | -1.157616000 | 0.082062000  |
|  | H | 6.229164000  | -3.871215000 | 0.099084000  |
|  | H | 4.378645000  | -2.688093000 | -2.011590000 |
|  | H | 4.376027000  | -4.315787000 | -1.335750000 |
|  | H | 3.752252000  | -1.802244000 | 0.268568000  |
|  | H | 3.736946000  | -3.479444000 | 0.870054000  |
|  | H | 1.466891000  | -2.576380000 | 0.358051000  |
|  | H | 1.937626000  | -2.405548000 | -1.346348000 |
|  | H | 2.186065000  | -4.935539000 | 0.192821000  |

|  |    |               |              |              |
|--|----|---------------|--------------|--------------|
|  | H  | 1.680017000   | -6.921126000 | -2.464161000 |
|  | H  | 2.147967000   | -6.752019000 | -0.827613000 |
|  | H  | 1.431404000   | -4.955625000 | -3.732774000 |
|  | H  | 1.505598000   | -3.436769000 | -2.987702000 |
|  | N  | 6.844659000   | -2.595034000 | -2.876938000 |
|  | H  | 7.491317000   | -2.731133000 | -3.637384000 |
|  | H  | 6.549327000   | -1.634143000 | -2.704810000 |
|  | Cu | -4.427055000  | -3.868163000 | -1.143566000 |
|  | N  | -6.589283000  | -3.966568000 | 1.610617000  |
|  | C  | -5.265444000  | -3.357558000 | 1.846462000  |
|  | C  | -4.914475000  | -2.267297000 | 0.863167000  |
|  | O  | -3.982204000  | -1.500283000 | 1.082233000  |
|  | C  | -4.174680000  | -4.445924000 | 1.760315000  |
|  | C  | -2.873138000  | -4.008081000 | 2.429433000  |
|  | C  | -1.890251000  | -5.171005000 | 2.556368000  |
|  | C  | -0.692258000  | -4.725628000 | 3.390570000  |
|  | N  | 0.197385000   | -5.873137000 | 3.674727000  |
|  | H  | -5.246986000  | -2.918002000 | 2.848689000  |
|  | H  | -3.999512000  | -4.710002000 | 0.688454000  |
|  | H  | -4.543391000  | -5.339838000 | 2.261947000  |
|  | H  | -2.416159000  | -3.195962000 | 1.873041000  |
|  | H  | -3.121013000  | -3.643617000 | 3.425109000  |
|  | H  | -1.567810000  | -5.487650000 | 1.569111000  |
|  | H  | -2.395153000  | -6.004224000 | 3.042243000  |
|  | H  | -1.086867000  | -4.317472000 | 4.316558000  |
|  | H  | -0.137425000  | -3.973650000 | 2.843619000  |
|  | H  | 1.200984000   | -5.652095000 | 3.538637000  |
|  | H  | 0.070329000   | -6.236135000 | 4.617046000  |
|  | H  | -0.018490000  | -6.628268000 | 3.025791000  |
|  | H  | -7.329089000  | -3.267501000 | 1.357622000  |
|  | H  | -6.555439000  | -4.634663000 | 0.834035000  |
|  | H  | -6.899753000  | -4.468067000 | 2.447987000  |
|  | N  | -5.579204000  | -2.295751000 | -0.367028000 |
|  | C  | -5.302538000  | -1.168754000 | -1.272679000 |
|  | C  | -5.383431000  | 0.199401000  | -0.577898000 |
|  | O  | -4.616513000  | 1.107226000  | -0.897355000 |
|  | C  | -6.229275000  | -1.278868000 | -2.483713000 |
|  | C  | -5.998145000  | -0.153694000 | -3.491236000 |
|  | C  | -6.624260000  | -0.482733000 | -4.850048000 |
|  | N  | -8.023567000  | -0.855051000 | -4.746511000 |
|  | C  | -9.034467000  | -0.018004000 | -4.525419000 |
|  | N  | -8.836845000  | 1.283931000  | -4.340890000 |
|  | N  | -10.264149000 | -0.503175000 | -4.361900000 |
|  | H  | -6.600380000  | -2.448705000 | -0.294051000 |
|  | H  | -4.272923000  | -1.235278000 | -1.632248000 |
|  | H  | -6.032490000  | -2.238449000 | -2.968422000 |
|  | H  | -7.267613000  | -1.265157000 | -2.150524000 |
|  | H  | -6.409260000  | 0.778124000  | -3.103026000 |
|  | H  | -4.930302000  | 0.000661000  | -3.651881000 |
|  | H  | -6.103015000  | -1.328695000 | -5.297527000 |
|  | H  | -6.514606000  | 0.367007000  | -5.529220000 |
|  | H  | -8.246105000  | -1.835612000 | -4.815144000 |
|  | H  | -7.968072000  | 1.710732000  | -4.614888000 |
|  | H  | -9.668898000  | 1.864109000  | -4.331475000 |

|  |   |               |              |              |
|--|---|---------------|--------------|--------------|
|  | H | -11.018994000 | 0.174583000  | -4.345178000 |
|  | H | -10.486935000 | -1.448587000 | -4.621891000 |
|  | N | -6.234639000  | 0.277300000  | 0.448824000  |
|  | C | -6.342000000  | 1.473983000  | 1.265254000  |
|  | C | -4.951391000  | 1.972747000  | 1.685142000  |
|  | O | -4.715635000  | 3.181239000  | 1.761341000  |
|  | C | -7.204351000  | 1.155797000  | 2.507856000  |
|  | C | -6.939422000  | 2.138191000  | 3.646237000  |
|  | C | -8.689260000  | 1.167204000  | 2.119174000  |
|  | C | -9.567623000  | 0.411605000  | 3.111304000  |
|  | H | -6.973049000  | -0.418845000 | 0.541568000  |
|  | H | -6.810488000  | 2.294743000  | 0.703969000  |
|  | H | -6.946574000  | 0.148493000  | 2.845672000  |
|  | H | -8.822256000  | 0.711987000  | 1.134560000  |
|  | H | -9.039747000  | 2.199470000  | 2.035118000  |
|  | H | -10.613899000 | 0.477988000  | 2.812288000  |
|  | H | -9.292144000  | -0.639599000 | 3.139023000  |
|  | H | -9.485905000  | 0.822227000  | 4.113477000  |
|  | H | -7.630553000  | 1.959497000  | 4.464550000  |
|  | H | -5.928714000  | 2.033286000  | 4.027115000  |
|  | H | -7.080543000  | 3.162103000  | 3.306471000  |
|  | N | -4.090894000  | 1.030372000  | 2.039285000  |
|  | C | -2.742329000  | 1.275906000  | 2.503913000  |
|  | C | -1.761813000  | 1.340890000  | 1.326492000  |
|  | O | -0.963030000  | 2.285158000  | 1.241505000  |
|  | C | -2.310862000  | 0.184220000  | 3.516761000  |
|  | C | -3.459601000  | -0.188024000 | 4.453705000  |
|  | C | -1.129468000  | 0.693952000  | 4.340882000  |
|  | H | -4.301539000  | 0.053317000  | 1.847171000  |
|  | H | -2.721156000  | 2.259961000  | 2.982587000  |
|  | H | -2.016598000  | -0.703171000 | 2.954209000  |
|  | H | -0.724079000  | -0.102732000 | 4.952466000  |
|  | H | -0.341947000  | 1.093889000  | 3.711198000  |
|  | H | -1.449942000  | 1.494319000  | 5.005297000  |
|  | H | -3.093435000  | -0.867568000 | 5.215168000  |
|  | H | -4.275592000  | -0.661593000 | 3.921596000  |
|  | H | -3.850260000  | 0.693187000  | 4.958684000  |
|  | N | -1.803688000  | 0.311517000  | 0.485526000  |
|  | C | -0.981027000  | 0.167599000  | -0.707868000 |
|  | C | -0.779823000  | 1.490685000  | -1.441781000 |
|  | O | 0.313674000   | 1.815453000  | -1.921107000 |
|  | C | -1.593403000  | -0.799110000 | -1.729641000 |
|  | C | -1.734955000  | -2.232152000 | -1.191914000 |
|  | C | -1.932755000  | -3.208600000 | -2.320730000 |
|  | N | -0.923498000  | -3.364412000 | -3.160901000 |
|  | O | -2.963464000  | -3.906738000 | -2.431087000 |
|  | H | -2.525558000  | -0.396699000 | 0.629070000  |
|  | H | 0.020763000   | -0.187007000 | -0.444022000 |
|  | H | -0.923124000  | -0.785623000 | -2.591571000 |
|  | H | -2.547200000  | -0.392114000 | -2.065947000 |
|  | H | -0.815198000  | -2.496710000 | -0.677582000 |
|  | H | -2.569702000  | -2.305235000 | -0.495808000 |
|  | H | -1.056462000  | -3.945087000 | -3.975547000 |
|  | H | -0.151169000  | -2.700757000 | -3.207442000 |

|  |   |              |              |              |
|--|---|--------------|--------------|--------------|
|  | N | -1.872395000 | 2.249713000  | -1.511680000 |
|  | C | -1.889736000 | 3.636225000  | -1.939601000 |
|  | C | -0.491474000 | 4.256416000  | -1.784918000 |
|  | O | 0.059153000  | 4.829050000  | -2.723308000 |
|  | C | -2.938495000 | 4.332511000  | -1.063018000 |
|  | C | -2.968476000 | 5.852141000  | -1.195156000 |
|  | C | -4.136598000 | 6.431443000  | -0.376382000 |
|  | N | -4.192725000 | 5.872798000  | 0.955717000  |
|  | C | -3.442622000 | 6.219619000  | 2.000985000  |
|  | N | -2.790190000 | 7.377060000  | 2.051410000  |
|  | N | -3.387989000 | 5.378610000  | 3.024339000  |
|  | H | -2.775026000 | 1.869587000  | -1.224037000 |
|  | H | -2.139273000 | 3.722930000  | -3.006080000 |
|  | H | -3.914577000 | 3.923282000  | -1.331584000 |
|  | H | -2.725232000 | 4.067965000  | -0.026794000 |
|  | H | -3.086721000 | 6.140964000  | -2.240520000 |
|  | H | -2.017732000 | 6.267108000  | -0.856272000 |
|  | H | -5.076831000 | 6.181825000  | -0.869820000 |
|  | H | -4.063884000 | 7.519492000  | -0.341078000 |
|  | H | -4.599756000 | 4.942780000  | 1.021386000  |
|  | H | -2.816225000 | 8.024755000  | 1.285606000  |
|  | H | -2.260359000 | 7.628963000  | 2.867027000  |
|  | H | -3.879590000 | 4.497177000  | 2.933196000  |
|  | H | -2.952851000 | 5.633529000  | 3.893444000  |
|  | N | 0.002413000  | 4.200141000  | -0.539411000 |
|  | C | 1.381447000  | 4.506520000  | -0.226709000 |
|  | C | 2.248606000  | 3.240646000  | -0.133630000 |
|  | O | 3.370950000  | 3.197639000  | -0.660649000 |
|  | C | 1.471614000  | 5.285306000  | 1.105767000  |
|  | C | 2.929946000  | 5.590603000  | 1.441456000  |
|  | C | 0.636888000  | 6.567726000  | 1.007715000  |
|  | C | 0.638812000  | 7.385862000  | 2.294991000  |
|  | H | -0.487458000 | 3.620146000  | 0.146199000  |
|  | H | 1.785577000  | 5.109267000  | -1.048616000 |
|  | H | 1.053969000  | 4.648428000  | 1.890959000  |
|  | H | 1.022071000  | 7.176130000  | 0.184654000  |
|  | H | -0.386967000 | 6.288194000  | 0.758286000  |
|  | H | -0.014056000 | 8.246975000  | 2.186683000  |
|  | H | 0.310544000  | 6.777087000  | 3.131307000  |
|  | H | 1.634385000  | 7.761996000  | 2.513556000  |
|  | H | 3.023424000  | 5.988205000  | 2.446982000  |
|  | H | 3.339036000  | 6.317845000  | 0.740859000  |
|  | H | 3.547712000  | 4.698393000  | 1.372021000  |
|  | N | 1.754762000  | 2.262377000  | 0.617230000  |
|  | C | 2.527775000  | 1.101009000  | 1.018278000  |
|  | C | 3.263543000  | 0.455097000  | -0.132844000 |
|  | O | 4.318923000  | -0.174693000 | 0.099914000  |
|  | C | 1.660089000  | 0.032356000  | 1.714406000  |
|  | C | 2.391012000  | -0.623999000 | 2.889357000  |
|  | C | 1.633126000  | -1.850711000 | 3.410867000  |
|  | C | 2.073796000  | -2.183678000 | 4.834971000  |
|  | N | 1.656896000  | -3.563942000 | 5.135776000  |
|  | H | 0.781435000  | 2.309855000  | 0.940848000  |
|  | H | 3.316332000  | 1.443733000  | 1.704246000  |

|  |   |              |              |              |
|--|---|--------------|--------------|--------------|
|  | H | 1.403698000  | -0.728564000 | 0.982554000  |
|  | H | 0.754104000  | 0.517641000  | 2.068319000  |
|  | H | 3.392267000  | -0.904267000 | 2.559872000  |
|  | H | 2.516327000  | 0.121913000  | 3.676060000  |
|  | H | 0.571803000  | -1.621664000 | 3.397504000  |
|  | H | 1.869457000  | -2.710441000 | 2.789748000  |
|  | H | 1.640188000  | -1.483348000 | 5.547859000  |
|  | H | 3.153913000  | -2.101738000 | 4.914361000  |
|  | H | 1.938789000  | -3.833686000 | 6.076770000  |
|  | H | 0.644050000  | -3.637955000 | 5.033798000  |
|  | H | 2.121881000  | -4.201725000 | 4.461830000  |
|  | N | 2.696483000  | 0.432007000  | -1.344514000 |
|  | C | 3.435173000  | -0.091285000 | -2.471025000 |
|  | C | 4.914861000  | 0.265162000  | -2.456149000 |
|  | O | 5.765516000  | -0.538023000 | -2.900448000 |
|  | C | 2.817886000  | 0.359573000  | -3.791997000 |
|  | C | 1.578398000  | -0.496613000 | -4.211503000 |
|  | O | 1.176334000  | -1.365440000 | -3.421003000 |
|  | O | 1.081109000  | -0.234290000 | -5.320562000 |
|  | H | 1.865288000  | 0.993894000  | -1.556387000 |
|  | H | 3.397383000  | -1.191107000 | -2.455774000 |
|  | H | 3.550364000  | 0.268884000  | -4.600189000 |
|  | H | 2.510375000  | 1.407395000  | -3.744364000 |
|  | N | 5.287533000  | 1.466989000  | -1.989963000 |
|  | C | 6.693689000  | 1.783677000  | -1.811492000 |
|  | C | 7.486121000  | 0.607487000  | -1.207139000 |
|  | O | 8.591491000  | 0.259488000  | -1.659089000 |
|  | C | 6.809981000  | 3.012869000  | -0.897962000 |
|  | C | 8.252998000  | 3.340237000  | -0.649509000 |
|  | C | 8.981965000  | 4.064363000  | -1.583145000 |
|  | C | 8.895173000  | 2.882364000  | 0.493241000  |
|  | C | 10.239542000 | 3.140268000  | 0.697240000  |
|  | C | 10.958543000 | 3.861104000  | -0.240382000 |
|  | C | 10.326551000 | 4.323990000  | -1.381861000 |
|  | H | 4.601957000  | 2.099237000  | -1.571249000 |
|  | H | 7.160914000  | 1.979147000  | -2.787548000 |
|  | H | 6.307085000  | 2.786221000  | 0.042593000  |
|  | H | 6.300180000  | 3.847241000  | -1.382750000 |
|  | H | 8.493220000  | 4.418755000  | -2.479770000 |
|  | H | 8.340845000  | 2.305054000  | 1.218268000  |
|  | H | 10.730144000 | 2.770087000  | 1.585490000  |
|  | H | 12.009105000 | 4.056385000  | -0.085988000 |
|  | H | 10.883104000 | 4.881548000  | -2.120411000 |
|  | N | 6.918121000  | 0.101039000  | -0.097870000 |
|  | C | 7.332397000  | -1.098689000 | 0.620319000  |
|  | C | 6.978661000  | -2.386802000 | -0.115730000 |
|  | O | 7.891052000  | -3.191552000 | -0.490622000 |
|  | C | 6.656928000  | -1.011186000 | 1.999463000  |
|  | C | 6.958038000  | -2.183419000 | 2.941416000  |
|  | C | 8.341539000  | -2.029684000 | 3.576019000  |
|  | C | 5.873217000  | -2.283224000 | 4.016328000  |
|  | H | 5.903052000  | 0.253722000  | -0.017322000 |
|  | H | 8.431703000  | -1.091136000 | 0.680368000  |
|  | H | 6.984426000  | -0.079500000 | 2.463886000  |

|   |    |              |              |              |
|---|----|--------------|--------------|--------------|
|   | H  | 5.585386000  | -0.956729000 | 1.806691000  |
|   | H  | 6.995042000  | -3.098433000 | 2.326659000  |
|   | H  | 8.577032000  | -2.881783000 | 4.214253000  |
|   | H  | 8.394971000  | -1.119057000 | 4.167311000  |
|   | H  | 9.114888000  | -1.983522000 | 2.802911000  |
|   | H  | 6.095070000  | -3.109847000 | 4.686908000  |
|   | H  | 5.870287000  | -1.359432000 | 4.586574000  |
|   | H  | 4.906608000  | -2.435245000 | 3.546439000  |
|   | N  | 5.651569000  | -2.645927000 | -0.288036000 |
|   | C  | 5.175957000  | -3.838992000 | -0.993810000 |
|   | C  | 5.959875000  | -4.156154000 | -2.248828000 |
|   | O  | 6.646002000  | -5.210423000 | -2.336764000 |
|   | C  | 3.651057000  | -3.812852000 | -1.215236000 |
|   | C  | 2.871845000  | -3.098273000 | -0.102725000 |
|   | C  | 1.364429000  | -3.411605000 | -0.119547000 |
|   | N  | 1.037613000  | -4.641247000 | 0.562069000  |
|   | C  | 0.824662000  | -5.834478000 | 0.017882000  |
|   | N  | 0.846868000  | -6.875626000 | 0.854925000  |
|   | N  | 0.337599000  | -5.971842000 | -1.220691000 |
|   | H  | 5.057932000  | -1.810873000 | -0.323375000 |
|   | H  | 5.460860000  | -4.688690000 | -0.357633000 |
|   | H  | 3.479368000  | -3.335035000 | -2.184301000 |
|   | H  | 3.352210000  | -4.859354000 | -1.308450000 |
|   | H  | 3.004615000  | -2.032448000 | -0.251958000 |
|   | H  | 3.293327000  | -3.354515000 | 0.862824000  |
|   | H  | 0.883914000  | -2.616042000 | 0.449971000  |
|   | H  | 1.039750000  | -3.383280000 | -1.158698000 |
|   | H  | 1.435353000  | -4.675504000 | 1.511283000  |
|   | H  | 0.720288000  | -7.801687000 | 0.482111000  |
|   | H  | 1.459414000  | -6.770541000 | 1.661091000  |
|   | H  | 0.247517000  | -6.883986000 | -1.631772000 |
|   | H  | 0.369723000  | -5.198735000 | -1.863226000 |
|   | N  | 5.814985000  | -3.307537000 | -3.320742000 |
|   | H  | 6.514808000  | -3.447839000 | -4.036911000 |
|   | H  | 5.687318000  | -2.314663000 | -3.112269000 |
|   | Cu | -2.864301000 | 2.573281000  | 2.069408000  |
|   | N  | -4.464235000 | -5.818668000 | -1.571031000 |
|   | C  | -4.221226000 | -5.077289000 | -0.311123000 |
|   | C  | -4.412205000 | -3.580247000 | -0.569188000 |
|   | O  | -3.753807000 | -2.724067000 | 0.011019000  |
|   | C  | -2.815872000 | -5.497821000 | 0.150911000  |
|   | C  | -2.286671000 | -4.907173000 | 1.461420000  |
|   | C  | -1.240828000 | -5.864668000 | 2.041103000  |
|   | C  | -0.407597000 | -5.232468000 | 3.149552000  |
|   | N  | 0.685791000  | -6.159068000 | 3.524942000  |
|   | H  | -4.967698000 | -5.378263000 | 0.432252000  |
|   | H  | -2.110110000 | -5.288060000 | -0.652558000 |
|   | H  | -2.860188000 | -6.581401000 | 0.273213000  |
|   | H  | -1.815268000 | -3.950796000 | 1.261733000  |
|   | H  | -3.108180000 | -4.772275000 | 2.162695000  |
|   | H  | -0.576502000 | -6.166975000 | 1.239027000  |
|   | H  | -1.751761000 | -6.752253000 | 2.414929000  |
|   | H  | -1.046908000 | -5.049003000 | 4.010501000  |
|   | H  | 0.025090000  | -4.306424000 | 2.787827000  |
| 4 |    |              |              |              |

|  |   |               |              |              |
|--|---|---------------|--------------|--------------|
|  | H | 1.584621000   | -6.020076000 | 2.999700000  |
|  | H | 0.931541000   | -6.091159000 | 4.509798000  |
|  | H | 0.396646000   | -7.121765000 | 3.356322000  |
|  | H | -5.452394000  | -5.810724000 | -1.900777000 |
|  | H | -3.886438000  | -5.386902000 | -2.318361000 |
|  | H | -4.184075000  | -6.796095000 | -1.467464000 |
|  | N | -5.395600000  | -3.270749000 | -1.419801000 |
|  | C | -5.469530000  | -1.975856000 | -2.071654000 |
|  | C | -5.392819000  | -0.812485000 | -1.085927000 |
|  | O | -4.628579000  | 0.135541000  | -1.235813000 |
|  | C | -6.780697000  | -1.844935000 | -2.853688000 |
|  | C | -6.777846000  | -0.583564000 | -3.729765000 |
|  | C | -8.138493000  | 0.120822000  | -3.737833000 |
|  | N | -8.406997000  | 0.802256000  | -2.483439000 |
|  | C | -7.977238000  | 2.028232000  | -2.181973000 |
|  | N | -7.047219000  | 2.645492000  | -2.901244000 |
|  | N | -8.344371000  | 2.594653000  | -1.025092000 |
|  | H | -5.977913000  | -3.989542000 | -1.841823000 |
|  | H | -4.633890000  | -1.884233000 | -2.779813000 |
|  | H | -6.911486000  | -2.736794000 | -3.468110000 |
|  | H | -7.617314000  | -1.817097000 | -2.155700000 |
|  | H | -6.026410000  | 0.116817000  | -3.364751000 |
|  | H | -6.512935000  | -0.844077000 | -4.754380000 |
|  | H | -8.929860000  | -0.610147000 | -3.905890000 |
|  | H | -8.180369000  | 0.839583000  | -4.561650000 |
|  | H | -9.087559000  | 0.384549000  | -1.867679000 |
|  | H | -6.806155000  | 2.297876000  | -3.814534000 |
|  | H | -7.006006000  | 3.655214000  | -2.776809000 |
|  | H | -8.236551000  | 3.607303000  | -1.012677000 |
|  | H | -9.175617000  | 2.250893000  | -0.568424000 |
|  | N | -6.261029000  | -0.876009000 | -0.075382000 |
|  | C | -6.425346000  | 0.216555000  | 0.866811000  |
|  | C | -5.065906000  | 0.614700000  | 1.426357000  |
|  | O | -4.817251000  | 1.804923000  | 1.679097000  |
|  | C | -7.378210000  | -0.219369000 | 2.002114000  |
|  | C | -7.315569000  | 0.760450000  | 3.172159000  |
|  | C | -8.811340000  | -0.328514000 | 1.460797000  |
|  | C | -9.699727000  | -1.217469000 | 2.326968000  |
|  | H | -6.868810000  | -1.677784000 | 0.006517000  |
|  | H | -6.842002000  | 1.094848000  | 0.357181000  |
|  | H | -7.063525000  | -1.206660000 | 2.352651000  |
|  | H | -8.803940000  | -0.746433000 | 0.452850000  |
|  | H | -9.252315000  | 0.667959000  | 1.409782000  |
|  | H | -10.705437000 | -1.268887000 | 1.913081000  |
|  | H | -9.310447000  | -2.231813000 | 2.378223000  |
|  | H | -9.784837000  | -0.834010000 | 3.340373000  |
|  | H | -8.061548000  | 0.497460000  | 3.916609000  |
|  | H | -6.343734000  | 0.734247000  | 3.653860000  |
|  | H | -7.523340000  | 1.770532000  | 2.831377000  |
|  | N | -4.246702000  | -0.384663000 | 1.682972000  |
|  | C | -2.933712000  | -0.249695000 | 2.278456000  |
|  | C | -1.961435000  | 0.190035000  | 1.176178000  |
|  | O | -1.478928000  | 1.351528000  | 1.221300000  |
|  | C | -2.606706000  | -1.564895000 | 3.005188000  |

|  |   |              |              |              |
|--|---|--------------|--------------|--------------|
|  | C | -3.581636000 | -1.749082000 | 4.168534000  |
|  | C | -1.172643000 | -1.555619000 | 3.510174000  |
|  | H | -4.452522000 | -1.313877000 | 1.323226000  |
|  | H | -2.961101000 | 0.568941000  | 3.017227000  |
|  | H | -2.748102000 | -2.383609000 | 2.300408000  |
|  | H | -0.996139000 | -2.458750000 | 4.077969000  |
|  | H | -0.484795000 | -1.500738000 | 2.679291000  |
|  | H | -1.012371000 | -0.702433000 | 4.161976000  |
|  | H | -3.416185000 | -2.711825000 | 4.640379000  |
|  | H | -4.616772000 | -1.713157000 | 3.841707000  |
|  | H | -3.438400000 | -0.979866000 | 4.923589000  |
|  | N | -1.738058000 | -0.671804000 | 0.211778000  |
|  | C | -0.992246000 | -0.440662000 | -1.015835000 |
|  | C | -0.981975000 | 1.018405000  | -1.472230000 |
|  | O | 0.070146000  | 1.582991000  | -1.791214000 |
|  | C | -1.624510000 | -1.227237000 | -2.177279000 |
|  | C | -1.303081000 | -2.722337000 | -2.122555000 |
|  | C | -1.904407000 | -3.428905000 | -3.315758000 |
|  | N | -1.367949000 | -3.117562000 | -4.494414000 |
|  | O | -2.835131000 | -4.230427000 | -3.207256000 |
|  | H | -2.259858000 | -1.553796000 | 0.228072000  |
|  | H | 0.050492000  | -0.754846000 | -0.893775000 |
|  | H | -1.235809000 | -0.819188000 | -3.113930000 |
|  | H | -2.701739000 | -1.066962000 | -2.165736000 |
|  | H | -0.225973000 | -2.845334000 | -2.191957000 |
|  | H | -1.685401000 | -3.170282000 | -1.209581000 |
|  | H | -1.714227000 | -3.554638000 | -5.332404000 |
|  | H | -0.571616000 | -2.491046000 | -4.586567000 |
|  | N | -2.180582000 | 1.592793000  | -1.501538000 |
|  | C | -2.462711000 | 2.962846000  | -1.898911000 |
|  | C | -1.225028000 | 3.849121000  | -1.708265000 |
|  | O | -0.801701000 | 4.556492000  | -2.615207000 |
|  | C | -3.659263000 | 3.404347000  | -1.041532000 |
|  | C | -3.997169000 | 4.890746000  | -1.120609000 |
|  | C | -5.222328000 | 5.213157000  | -0.244098000 |
|  | N | -5.109001000 | 4.607059000  | 1.067512000  |
|  | C | -4.309114000 | 5.026392000  | 2.029876000  |
|  | N | -3.738480000 | 6.214467000  | 2.027784000  |
|  | N | -4.027948000 | 4.154783000  | 3.053642000  |
|  | H | -3.016142000 | 1.018427000  | -1.376984000 |
|  | H | -2.704623000 | 3.019534000  | -2.968010000 |
|  | H | -4.524154000 | 2.817874000  | -1.353681000 |
|  | H | -3.415212000 | 3.145865000  | -0.006294000 |
|  | H | -4.225705000 | 5.177159000  | -2.147169000 |
|  | H | -3.132003000 | 5.481113000  | -0.814235000 |
|  | H | -6.126558000 | 4.836662000  | -0.721137000 |
|  | H | -5.348481000 | 6.294164000  | -0.167560000 |
|  | H | -5.428512000 | 3.641048000  | 1.135213000  |
|  | H | -3.892354000 | 6.863314000  | 1.274595000  |
|  | H | -3.162987000 | 6.524938000  | 2.794019000  |
|  | H | -4.790569000 | 3.524300000  | 3.294123000  |
|  | H | -3.593699000 | 4.565325000  | 3.874579000  |
|  | N | -0.725238000 | 3.851182000  | -0.456487000 |
|  | C | 0.581549000  | 4.403644000  | -0.160281000 |



|   |              |              |              |
|---|--------------|--------------|--------------|
| C | 1.651245000  | 3.311299000  | -0.036046000 |
| O | 2.743031000  | 3.393455000  | -0.605056000 |
| C | 0.549413000  | 5.230319000  | 1.146064000  |
| C | 1.946719000  | 5.757139000  | 1.467754000  |
| C | -0.463207000 | 6.372597000  | 1.003628000  |
| C | -0.592204000 | 7.216053000  | 2.269539000  |
| H | -1.053384000 | 3.122100000  | 0.169885000  |
| H | 0.865782000  | 5.043425000  | -1.002821000 |
| H | 0.231172000  | 4.570505000  | 1.958814000  |
| H | -0.160217000 | 7.012569000  | 0.170983000  |
| H | -1.429783000 | 5.939904000  | 0.746510000  |
| H | -1.385321000 | 7.949516000  | 2.154180000  |
| H | -0.784119000 | 6.588126000  | 3.134180000  |
| H | 0.322890000  | 7.771727000  | 2.456859000  |
| H | 1.968814000  | 6.233862000  | 2.442624000  |
| H | 2.263479000  | 6.485446000  | 0.722131000  |
| H | 2.683396000  | 4.957987000  | 1.468380000  |
| N | 1.350852000  | 2.324080000  | 0.810967000  |
| C | 2.345423000  | 1.384412000  | 1.284744000  |
| C | 3.124774000  | 0.721390000  | 0.166660000  |
| O | 4.266255000  | 0.299496000  | 0.418492000  |
| C | 1.695459000  | 0.307507000  | 2.167621000  |
| C | 2.719749000  | -0.410790000 | 3.055971000  |
| C | 2.116183000  | -1.679631000 | 3.655995000  |
| C | 3.141109000  | -2.563704000 | 4.356386000  |
| N | 2.532092000  | -3.902689000 | 4.510480000  |
| H | 0.404470000  | 2.192489000  | 1.155802000  |
| H | 3.096976000  | 1.935410000  | 1.868178000  |
| H | 1.202513000  | -0.405665000 | 1.510784000  |
| H | 0.955021000  | 0.798008000  | 2.797180000  |
| H | 3.598230000  | -0.669166000 | 2.466241000  |
| H | 3.059263000  | 0.269266000  | 3.838823000  |
| H | 1.343933000  | -1.393682000 | 4.364336000  |
| H | 1.697818000  | -2.268155000 | 2.847418000  |
| H | 3.417961000  | -2.147884000 | 5.324917000  |
| H | 4.049571000  | -2.652651000 | 3.763351000  |
| H | 3.040891000  | -4.457199000 | 5.197214000  |
| H | 1.555706000  | -3.797091000 | 4.790732000  |
| H | 2.629491000  | -4.454496000 | 3.625296000  |
| N | 2.524456000  | 0.504789000  | -0.999556000 |
| C | 3.240278000  | -0.119227000 | -2.094153000 |
| C | 4.651253000  | 0.421122000  | -2.280786000 |
| O | 5.554244000  | -0.311380000 | -2.707210000 |
| C | 2.481219000  | -0.021002000 | -3.419113000 |
| C | 1.634432000  | -1.293847000 | -3.728634000 |
| O | 1.766633000  | -2.283441000 | -2.991773000 |
| O | 0.850980000  | -1.215615000 | -4.697359000 |
| H | 1.627968000  | 0.950322000  | -1.233084000 |
| H | 3.358238000  | -1.191949000 | -1.883499000 |
| H | 3.183393000  | 0.074924000  | -4.252963000 |
| H | 1.824651000  | 0.850281000  | -3.445803000 |
| N | 4.859798000  | 1.703869000  | -1.974281000 |
| C | 6.190501000  | 2.279586000  | -1.997194000 |
| C | 7.220544000  | 1.303654000  | -1.390139000 |

|  |   |              |              |              |
|--|---|--------------|--------------|--------------|
|  | O | 8.318370000  | 1.116468000  | -1.907719000 |
|  | C | 6.185546000  | 3.585762000  | -1.188505000 |
|  | C | 7.587576000  | 4.097020000  | -1.017308000 |
|  | C | 8.232807000  | 4.746704000  | -2.061172000 |
|  | C | 8.277322000  | 3.885055000  | 0.168822000  |
|  | C | 9.586378000  | 4.309413000  | 0.308156000  |
|  | C | 10.223232000 | 4.951692000  | -0.739557000 |
|  | C | 9.542184000  | 5.171114000  | -1.924916000 |
|  | H | 4.101785000  | 2.297318000  | -1.637268000 |
|  | H | 6.519195000  | 2.461432000  | -3.029124000 |
|  | H | 5.741212000  | 3.387168000  | -0.213361000 |
|  | H | 5.571241000  | 4.317064000  | -1.715679000 |
|  | H | 7.709481000  | 4.915791000  | -2.991570000 |
|  | H | 7.789488000  | 3.375406000  | 0.985601000  |
|  | H | 10.116605000 | 4.133535000  | 1.232254000  |
|  | H | 11.247996000 | 5.276631000  | -0.636573000 |
|  | H | 10.035676000 | 5.668655000  | -2.747100000 |
|  | N | 6.830076000  | 0.801034000  | -0.216245000 |
|  | C | 7.524606000  | -0.217672000 | 0.543427000  |
|  | C | 7.193282000  | -1.627207000 | 0.030874000  |
|  | O | 8.090004000  | -2.429498000 | -0.271416000 |
|  | C | 7.102206000  | -0.066817000 | 2.014109000  |
|  | C | 7.439912000  | -1.259034000 | 2.916855000  |
|  | C | 8.948847000  | -1.481583000 | 3.001597000  |
|  | C | 6.847113000  | -1.025870000 | 4.306537000  |
|  | H | 5.839600000  | 0.882739000  | 0.028775000  |
|  | H | 8.601922000  | -0.082198000 | 0.397461000  |
|  | H | 7.584132000  | 0.827725000  | 2.411068000  |
|  | H | 6.022227000  | 0.081422000  | 2.023002000  |
|  | H | 7.005269000  | -2.167160000 | 2.482260000  |
|  | H | 9.184916000  | -2.279736000 | 3.704663000  |
|  | H | 9.463725000  | -0.577694000 | 3.320766000  |
|  | H | 9.350990000  | -1.779375000 | 2.031032000  |
|  | H | 7.011618000  | -1.899437000 | 4.930477000  |
|  | H | 7.336205000  | -0.175239000 | 4.773516000  |
|  | H | 5.783672000  | -0.829087000 | 4.230318000  |
|  | N | 5.901641000  | -1.942763000 | 0.000981000  |
|  | C | 5.491050000  | -3.307157000 | -0.269854000 |
|  | C | 6.262385000  | -3.871144000 | -1.455286000 |
|  | O | 6.760639000  | -5.003933000 | -1.439225000 |
|  | C | 3.992199000  | -3.473886000 | -0.543858000 |
|  | C | 3.097461000  | -2.852120000 | 0.527660000  |
|  | C | 1.622575000  | -3.117327000 | 0.202589000  |
|  | N | 1.315845000  | -4.514654000 | 0.406676000  |
|  | C | 1.314857000  | -5.443929000 | -0.537883000 |
|  | N | 1.230485000  | -6.715053000 | -0.114249000 |
|  | N | 1.116686000  | -5.159760000 | -1.832535000 |
|  | H | 5.195004000  | -1.219778000 | 0.170474000  |
|  | H | 5.784186000  | -3.913475000 | 0.599282000  |
|  | H | 3.783138000  | -3.074473000 | -1.539263000 |
|  | H | 3.833932000  | -4.553955000 | -0.587022000 |
|  | H | 3.276833000  | -1.785466000 | 0.556928000  |
|  | H | 3.349733000  | -3.313518000 | 1.478739000  |
|  | H | 0.991907000  | -2.558644000 | 0.891746000  |

|  |    |               |              |              |
|--|----|---------------|--------------|--------------|
|  | H  | 1.422666000   | -2.791198000 | -0.814827000 |
|  | H  | 1.707621000   | -4.855464000 | 1.299290000  |
|  | H  | 1.310399000   | -7.457008000 | -0.788695000 |
|  | H  | 1.647698000   | -6.886238000 | 0.795548000  |
|  | H  | 1.160502000   | -5.904182000 | -2.506384000 |
|  | H  | 1.359825000   | -4.250043000 | -2.197765000 |
|  | N  | 6.204171000   | -3.131366000 | -2.573336000 |
|  | H  | 6.784508000   | -3.412738000 | -3.347168000 |
|  | H  | 5.952149000   | -2.143938000 | -2.538399000 |
|  | Cu | 7.317983000   | -0.651502000 | -2.320772000 |
|  | N  | -4.938391000  | -5.421549000 | -1.353444000 |
|  | C  | -4.693515000  | -4.675396000 | -0.095742000 |
|  | C  | -4.814311000  | -3.175060000 | -0.369778000 |
|  | O  | -4.122138000  | -2.348680000 | 0.215033000  |
|  | C  | -3.317714000  | -5.139926000 | 0.407132000  |
|  | C  | -2.810559000  | -4.567038000 | 1.736674000  |
|  | C  | -1.871373000  | -5.597388000 | 2.372625000  |
|  | C  | -1.005917000  | -5.024444000 | 3.488335000  |
|  | N  | -0.026080000  | -6.055961000 | 3.900566000  |
|  | H  | -5.470891000  | -4.933274000 | 0.632095000  |
|  | H  | -2.583843000  | -4.948266000 | -0.374829000 |
|  | H  | -3.405435000  | -6.220495000 | 0.527856000  |
|  | H  | -2.270609000  | -3.644361000 | 1.549417000  |
|  | H  | -3.654090000  | -4.354148000 | 2.391645000  |
|  | H  | -1.223048000  | -5.976795000 | 1.591874000  |
|  | H  | -2.478327000  | -6.419334000 | 2.751451000  |
|  | H  | -1.642315000  | -4.752396000 | 4.327375000  |
|  | H  | -0.478385000  | -4.150540000 | 3.122786000  |
|  | H  | 0.825070000   | -6.091036000 | 3.307207000  |
|  | H  | 0.298755000   | -5.917328000 | 4.854895000  |
|  | H  | -0.465077000  | -6.975917000 | 3.864989000  |
|  | H  | -5.921258000  | -5.385227000 | -1.692870000 |
|  | H  | -4.343738000  | -5.009650000 | -2.098952000 |
|  | H  | -4.687782000  | -6.405885000 | -1.236812000 |
|  | N  | -5.759923000  | -2.829463000 | -1.248874000 |
|  | C  | -5.785937000  | -1.527396000 | -1.888828000 |
|  | C  | -5.707002000  | -0.376250000 | -0.885323000 |
|  | O  | -4.960969000  | 0.586256000  | -1.042934000 |
|  | C  | -7.062547000  | -1.379006000 | -2.721841000 |
|  | C  | -7.005465000  | -0.140289000 | -3.613276000 |
|  | C  | -8.250644000  | -0.018487000 | -4.495329000 |
|  | N  | -9.443461000  | 0.297068000  | -3.733927000 |
|  | C  | -9.833386000  | 1.521943000  | -3.379354000 |
|  | N  | -9.074439000  | 2.591241000  | -3.594699000 |
|  | N  | -10.950600000 | 1.676682000  | -2.669736000 |
|  | H  | -6.372237000  | -3.524747000 | -1.669044000 |
|  | H  | -4.923338000  | -1.440690000 | -2.564904000 |
|  | H  | -7.169356000  | -2.272657000 | -3.340264000 |
|  | H  | -7.930272000  | -1.324606000 | -2.063153000 |
|  | H  | -6.906515000  | 0.756415000  | -3.000627000 |
|  | H  | -6.131463000  | -0.202559000 | -4.263096000 |
|  | H  | -8.425941000  | -0.965412000 | -5.007932000 |
|  | H  | -8.095383000  | 0.745667000  | -5.260652000 |
|  | H  | -10.034753000 | -0.474417000 | -3.468167000 |

|  |   |               |              |              |
|--|---|---------------|--------------|--------------|
|  | H | -8.286501000  | 2.539185000  | -4.218224000 |
|  | H | -9.542467000  | 3.488084000  | -3.503515000 |
|  | H | -11.309507000 | 2.624370000  | -2.612923000 |
|  | H | -11.619475000 | 0.928121000  | -2.603419000 |
|  | N | -6.534342000  | -0.502777000 | 0.153296000  |
|  | C | -6.723056000  | 0.516692000  | 1.167809000  |
|  | C | -5.372192000  | 0.989189000  | 1.715463000  |
|  | O | -5.198971000  | 2.156134000  | 2.069994000  |
|  | C | -7.593730000  | -0.064477000 | 2.304007000  |
|  | C | -7.557668000  | 0.828851000  | 3.541876000  |
|  | C | -9.037792000  | -0.249317000 | 1.814361000  |
|  | C | -9.826390000  | -1.238728000 | 2.667291000  |
|  | H | -7.137014000  | -1.312682000 | 0.191924000  |
|  | H | -7.226092000  | 1.392951000  | 0.738121000  |
|  | H | -7.186087000  | -1.045457000 | 2.568544000  |
|  | H | -9.046377000  | -0.610967000 | 0.784559000  |
|  | H | -9.545964000  | 0.717243000  | 1.819228000  |
|  | H | -10.838259000 | -1.343660000 | 2.281045000  |
|  | H | -9.358313000  | -2.219942000 | 2.657405000  |
|  | H | -9.902636000  | -0.903789000 | 3.698190000  |
|  | H | -8.241924000  | 0.451400000  | 4.295891000  |
|  | H | -6.563452000  | 0.862302000  | 3.976319000  |
|  | H | -7.859577000  | 1.842271000  | 3.288377000  |
|  | N | -4.466545000  | 0.034694000  | 1.852334000  |
|  | C | -3.154286000  | 0.207245000  | 2.442520000  |
|  | C | -2.132780000  | 0.536830000  | 1.343479000  |
|  | O | -1.465431000  | 1.574364000  | 1.391634000  |
|  | C | -2.855220000  | -1.074796000 | 3.243610000  |
|  | C | -3.816256000  | -1.168682000 | 4.429142000  |
|  | C | -1.413114000  | -1.122218000 | 3.723442000  |
|  | H | -4.637597000  | -0.881053000 | 1.446420000  |
|  | H | -3.188189000  | 1.080141000  | 3.102035000  |
|  | H | -3.044327000  | -1.918485000 | 2.578306000  |
|  | H | -1.279860000  | -2.005693000 | 4.333454000  |
|  | H | -0.745163000  | -1.143381000 | 2.874772000  |
|  | H | -1.190697000  | -0.244599000 | 4.323855000  |
|  | H | -3.678408000  | -2.111332000 | 4.947902000  |
|  | H | -4.853924000  | -1.107956000 | 4.110642000  |
|  | H | -3.638428000  | -0.363001000 | 5.138541000  |
|  | N | -2.037367000  | -0.371896000 | 0.373763000  |
|  | C | -1.269127000  | -0.201404000 | -0.847776000 |
|  | C | -1.178290000  | 1.258956000  | -1.281485000 |
|  | O | -0.100748000  | 1.774421000  | -1.602356000 |
|  | C | -1.928797000  | -0.948496000 | -2.016752000 |
|  | C | -1.694607000  | -2.459060000 | -1.951435000 |
|  | C | -2.329066000  | -3.138021000 | -3.142897000 |
|  | N | -1.763287000  | -2.871959000 | -4.318987000 |
|  | O | -3.296771000  | -3.893941000 | -3.035133000 |
|  | H | -2.693995000  | -1.151904000 | 0.367469000  |
|  | H | -0.242622000  | -0.564112000 | -0.715940000 |
|  | H | -1.505183000  | -0.559870000 | -2.947162000 |
|  | H | -2.994122000  | -0.718057000 | -2.020529000 |
|  | H | -0.624086000  | -2.631957000 | -2.016175000 |
|  | H | -2.104820000  | -2.868457000 | -1.032208000 |

|  |   |              |              |              |
|--|---|--------------|--------------|--------------|
|  | H | -2.145276000 | -3.272248000 | -5.159888000 |
|  | H | -0.956707000 | -2.258458000 | -4.411732000 |
|  | N | -2.347739000 | 1.890961000  | -1.305949000 |
|  | C | -2.554218000 | 3.302369000  | -1.570235000 |
|  | C | -1.258731000 | 4.090942000  | -1.353182000 |
|  | O | -0.800328000 | 4.811920000  | -2.236277000 |
|  | C | -3.678640000 | 3.750009000  | -0.627837000 |
|  | C | -3.956276000 | 5.250098000  | -0.647405000 |
|  | C | -5.193934000 | 5.571386000  | 0.208907000  |
|  | N | -5.132791000 | 4.935907000  | 1.505986000  |
|  | C | -4.419477000 | 5.339131000  | 2.555674000  |
|  | N | -3.940601000 | 6.576295000  | 2.653749000  |
|  | N | -4.212623000 | 4.467597000  | 3.533492000  |
|  | H | -3.207481000 | 1.366495000  | -1.147994000 |
|  | H | -2.835551000 | 3.463813000  | -2.620234000 |
|  | H | -4.579826000 | 3.207031000  | -0.919505000 |
|  | H | -3.404257000 | 3.443005000  | 0.381897000  |
|  | H | -4.133484000 | 5.588957000  | -1.669019000 |
|  | H | -3.082682000 | 5.789604000  | -0.278188000 |
|  | H | -6.085175000 | 5.193767000  | -0.293938000 |
|  | H | -5.308686000 | 6.652034000  | 0.308718000  |
|  | H | -5.381928000 | 3.948393000  | 1.522312000  |
|  | H | -4.106088000 | 7.256660000  | 1.934990000  |
|  | H | -3.455886000 | 6.870507000  | 3.483114000  |
|  | H | -4.558280000 | 3.525778000  | 3.408934000  |
|  | H | -3.788578000 | 4.740555000  | 4.402561000  |
|  | N | -0.746636000 | 3.998910000  | -0.116856000 |
|  | C | 0.577308000  | 4.494574000  | 0.193131000  |
|  | C | 1.610861000  | 3.364194000  | 0.258249000  |
|  | O | 2.712582000  | 3.448160000  | -0.297691000 |
|  | C | 0.583702000  | 5.260418000  | 1.536341000  |
|  | C | 1.981224000  | 5.811803000  | 1.812424000  |
|  | C | -0.466389000 | 6.376678000  | 1.498270000  |
|  | C | -0.533624000 | 7.181654000  | 2.792139000  |
|  | H | -1.128374000 | 3.287127000  | 0.503602000  |
|  | H | 0.872341000  | 5.164193000  | -0.622814000 |
|  | H | 0.320357000  | 4.553303000  | 2.328170000  |
|  | H | -0.242337000 | 7.044234000  | 0.661794000  |
|  | H | -1.438918000 | 5.923091000  | 1.306127000  |
|  | H | -1.339748000 | 7.907368000  | 2.735998000  |
|  | H | -0.693015000 | 6.524223000  | 3.641075000  |
|  | H | 0.387532000  | 7.734442000  | 2.954437000  |
|  | H | 2.053972000  | 6.199243000  | 2.823665000  |
|  | H | 2.218743000  | 6.614313000  | 1.115463000  |
|  | H | 2.739446000  | 5.042602000  | 1.689230000  |
|  | N | 1.282409000  | 2.344774000  | 1.048777000  |
|  | C | 2.249997000  | 1.350396000  | 1.462282000  |
|  | C | 2.963859000  | 0.679172000  | 0.308110000  |
|  | O | 4.080019000  | 0.171280000  | 0.518316000  |
|  | C | 1.570785000  | 0.292043000  | 2.344423000  |
|  | C | 2.560205000  | -0.507822000 | 3.200483000  |
|  | C | 1.858097000  | -1.710551000 | 3.830716000  |
|  | C | 2.815229000  | -2.700729000 | 4.485439000  |
|  | N | 2.063568000  | -3.954533000 | 4.696017000  |

|  |   |              |              |              |
|--|---|--------------|--------------|--------------|
|  | H | 0.314506000  | 2.190335000  | 1.329692000  |
|  | H | 3.041209000  | 1.860534000  | 2.031049000  |
|  | H | 1.015503000  | -0.369553000 | 1.682278000  |
|  | H | 0.870674000  | 0.817044000  | 2.992834000  |
|  | H | 3.391938000  | -0.840088000 | 2.581267000  |
|  | H | 2.982012000  | 0.149726000  | 3.962871000  |
|  | H | 1.149318000  | -1.339860000 | 4.566028000  |
|  | H | 1.336611000  | -2.241653000 | 3.042270000  |
|  | H | 3.196611000  | -2.304765000 | 5.425504000  |
|  | H | 3.664215000  | -2.895588000 | 3.835575000  |
|  | H | 2.605114000  | -4.616145000 | 5.250479000  |
|  | H | 1.179414000  | -3.737261000 | 5.157597000  |
|  | H | 1.932564000  | -4.442777000 | 3.791234000  |
|  | N | 2.335934000  | 0.532812000  | -0.863878000 |
|  | C | 3.029593000  | -0.057941000 | -1.989312000 |
|  | C | 4.440078000  | 0.474044000  | -2.197312000 |
|  | O | 5.278512000  | -0.279956000 | -2.783974000 |
|  | C | 2.226445000  | 0.075203000  | -3.286053000 |
|  | C | 1.294062000  | -1.142463000 | -3.558776000 |
|  | O | 1.380369000  | -2.132671000 | -2.817774000 |
|  | O | 0.498477000  | -1.026969000 | -4.515477000 |
|  | H | 1.479140000  | 1.053071000  | -1.071363000 |
|  | H | 3.142148000  | -1.136943000 | -1.804209000 |
|  | H | 2.902009000  | 0.134635000  | -4.144015000 |
|  | H | 1.618301000  | 0.981970000  | -3.288090000 |
|  | N | 4.716575000  | 1.712832000  | -1.774175000 |
|  | C | 6.054407000  | 2.276319000  | -1.664041000 |
|  | C | 7.031511000  | 1.297651000  | -1.025965000 |
|  | O | 8.119858000  | 0.987080000  | -1.652076000 |
|  | C | 5.969054000  | 3.574998000  | -0.846197000 |
|  | C | 7.338227000  | 4.176945000  | -0.720783000 |
|  | C | 7.840966000  | 5.000354000  | -1.719050000 |
|  | C | 8.145611000  | 3.869472000  | 0.366506000  |
|  | C | 9.430319000  | 4.375562000  | 0.453255000  |
|  | C | 9.923926000  | 5.195494000  | -0.547103000 |
|  | C | 9.125275000  | 5.508668000  | -1.633871000 |
|  | H | 3.977817000  | 2.250540000  | -1.317295000 |
|  | H | 6.453513000  | 2.487367000  | -2.665583000 |
|  | H | 5.568320000  | 3.340370000  | 0.139714000  |
|  | H | 5.286524000  | 4.261207000  | -1.349288000 |
|  | H | 7.223333000  | 5.243422000  | -2.572356000 |
|  | H | 7.767259000  | 3.222685000  | 1.142878000  |
|  | H | 10.052564000 | 4.127421000  | 1.300179000  |
|  | H | 10.928130000 | 5.587763000  | -0.483406000 |
|  | H | 9.505760000  | 6.146046000  | -2.418809000 |
|  | N | 6.678457000  | 0.782331000  | 0.175742000  |
|  | C | 7.204057000  | -0.501173000 | 0.708103000  |
|  | C | 6.674061000  | -1.676893000 | -0.059542000 |
|  | O | 7.337267000  | -2.183056000 | -1.066083000 |
|  | C | 6.831554000  | -0.517942000 | 2.196302000  |
|  | C | 7.040353000  | -1.856119000 | 2.913896000  |
|  | C | 8.489803000  | -2.327505000 | 2.809014000  |
|  | C | 6.618467000  | -1.717131000 | 4.376573000  |
|  | H | 5.673362000  | 0.854801000  | 0.370848000  |

|   |    |              |              |              |
|---|----|--------------|--------------|--------------|
|   | H  | 8.288808000  | -0.472875000 | 0.543065000  |
|   | H  | 7.425499000  | 0.253251000  | 2.688713000  |
|   | H  | 5.780046000  | -0.243529000 | 2.267045000  |
|   | H  | 6.415460000  | -2.607433000 | 2.425020000  |
|   | H  | 8.650270000  | -3.234099000 | 3.392074000  |
|   | H  | 9.179966000  | -1.566702000 | 3.169523000  |
|   | H  | 8.753942000  | -2.554330000 | 1.772962000  |
|   | H  | 6.676649000  | -2.678954000 | 4.876572000  |
|   | H  | 7.286721000  | -1.028821000 | 4.888254000  |
|   | H  | 5.607111000  | -1.331905000 | 4.434290000  |
|   | N  | 5.446344000  | -2.173362000 | 0.266173000  |
|   | C  | 5.021128000  | -3.441325000 | -0.289072000 |
|   | C  | 5.724956000  | -3.816720000 | -1.596631000 |
|   | O  | 6.402302000  | -4.856055000 | -1.670210000 |
|   | C  | 3.495655000  | -3.561413000 | -0.473261000 |
|   | C  | 2.663318000  | -2.951852000 | 0.658669000  |
|   | C  | 1.163897000  | -3.087570000 | 0.353283000  |
|   | N  | 0.716001000  | -4.446382000 | 0.534685000  |
|   | C  | 0.617819000  | -5.372513000 | -0.406260000 |
|   | N  | 0.391451000  | -6.622820000 | 0.010786000  |
|   | N  | 0.527768000  | -5.074071000 | -1.708502000 |
|   | H  | 4.730962000  | -1.458671000 | 0.443271000  |
|   | H  | 5.397680000  | -4.197461000 | 0.420501000  |
|   | H  | 3.239154000  | -3.098005000 | -1.428112000 |
|   | H  | 3.284584000  | -4.627211000 | -0.580693000 |
|   | H  | 2.895886000  | -1.896163000 | 0.720483000  |
|   | H  | 2.894445000  | -3.450181000 | 1.594941000  |
|   | H  | 0.600227000  | -2.477279000 | 1.056232000  |
|   | H  | 0.980762000  | -2.714144000 | -0.650964000 |
|   | H  | 0.952469000  | -4.811728000 | 1.464880000  |
|   | H  | 0.338743000  | -7.370119000 | -0.658165000 |
|   | H  | 0.686573000  | -6.843353000 | 0.956368000  |
|   | H  | 0.462194000  | -5.806755000 | -2.391476000 |
|   | H  | 0.830282000  | -4.179751000 | -2.061243000 |
|   | N  | 5.327699000  | -3.158094000 | -2.711326000 |
|   | H  | 5.849085000  | -3.383761000 | -3.545806000 |
|   | H  | 5.093706000  | -2.168271000 | -2.639723000 |
| 6 | Cu | 5.161755000  | -1.881706000 | -2.347451000 |
|   | N  | -4.759557000 | -5.565851000 | -1.182806000 |
|   | C  | -4.497200000 | -4.777604000 | 0.044955000  |
|   | C  | -4.667937000 | -3.290151000 | -0.266956000 |
|   | O  | -3.995782000 | -2.427871000 | 0.288089000  |
|   | C  | -3.090081000 | -5.183392000 | 0.510341000  |
|   | C  | -2.557956000 | -4.559340000 | 1.805303000  |
|   | C  | -1.509888000 | -5.508954000 | 2.393260000  |
|   | C  | -0.669449000 | -4.873263000 | 3.493505000  |
|   | N  | 0.377164000  | -5.838858000 | 3.903145000  |
|   | H  | -5.241406000 | -5.037018000 | 0.806041000  |
|   | H  | -2.392250000 | -4.985702000 | -0.302539000 |
|   | H  | -3.133909000 | -6.263262000 | 0.660333000  |
|   | H  | -2.101065000 | -3.599620000 | 1.585842000  |
|   | H  | -3.379172000 | -4.406902000 | 2.504478000  |
|   | H  | -0.854515000 | -5.819107000 | 1.587499000  |
|   | H  | -2.028716000 | -6.387007000 | 2.777909000  |

|  |   |               |              |              |
|--|---|---------------|--------------|--------------|
|  | H | -1.313928000  | -4.635965000 | 4.336747000  |
|  | H | -0.203075000  | -3.971355000 | 3.113365000  |
|  | H | 1.239788000   | -5.808563000 | 3.327434000  |
|  | H | 0.679258000   | -5.695572000 | 4.864063000  |
|  | H | 0.004187000   | -6.786470000 | 3.847417000  |
|  | H | -5.752895000  | -5.562503000 | -1.492375000 |
|  | H | -4.190980000  | -5.158046000 | -1.949423000 |
|  | H | -4.480931000  | -6.540025000 | -1.046316000 |
|  | N | -5.630884000  | -2.993851000 | -1.145381000 |
|  | C | -5.689973000  | -1.707879000 | -1.813799000 |
|  | C | -5.678353000  | -0.536489000 | -0.831543000 |
|  | O | -4.987762000  | 0.463378000  | -1.004883000 |
|  | C | -6.948735000  | -1.619866000 | -2.681119000 |
|  | C | -6.894509000  | -0.413130000 | -3.615943000 |
|  | C | -8.134040000  | -0.332574000 | -4.510179000 |
|  | N | -9.335278000  | -0.007981000 | -3.765655000 |
|  | C | -9.733695000  | 1.221019000  | -3.437042000 |
|  | N | -8.985122000  | 2.291714000  | -3.680747000 |
|  | N | -10.848300000 | 1.382540000  | -2.723968000 |
|  | H | -6.241326000  | -3.711767000 | -1.527267000 |
|  | H | -4.813621000  | -1.603810000 | -2.469027000 |
|  | H | -7.023200000  | -2.537392000 | -3.268490000 |
|  | H | -7.832671000  | -1.560269000 | -2.044493000 |
|  | H | -6.807247000  | 0.505373000  | -3.034668000 |
|  | H | -6.015594000  | -0.491823000 | -4.257011000 |
|  | H | -8.296248000  | -1.296310000 | -4.994831000 |
|  | H | -7.982406000  | 0.410039000  | -5.297038000 |
|  | H | -9.917595000  | -0.778441000 | -3.478156000 |
|  | H | -8.201270000  | 2.231515000  | -4.308861000 |
|  | H | -9.461454000  | 3.185834000  | -3.610383000 |
|  | H | -11.218301000 | 2.327237000  | -2.691996000 |
|  | H | -11.509931000 | 0.629512000  | -2.637817000 |
|  | N | -6.496597000  | -0.692607000 | 0.210701000  |
|  | C | -6.733420000  | 0.330273000  | 1.211291000  |
|  | C | -5.405857000  | 0.872941000  | 1.751919000  |
|  | O | -5.293063000  | 2.049233000  | 2.100696000  |
|  | C | -7.578014000  | -0.272730000 | 2.355506000  |
|  | C | -7.589973000  | 0.643649000  | 3.577038000  |
|  | C | -9.009598000  | -0.536629000 | 1.865391000  |
|  | C | -9.758074000  | -1.536823000 | 2.741583000  |
|  | H | -7.054638000  | -1.533256000 | 0.262454000  |
|  | H | -7.275777000  | 1.176715000  | 0.769566000  |
|  | H | -7.124265000  | -1.227973000 | 2.638884000  |
|  | H | -8.996264000  | -0.927636000 | 0.846339000  |
|  | H | -9.561187000  | 0.405604000  | 1.840870000  |
|  | H | -10.759202000 | -1.703966000 | 2.349004000  |
|  | H | -9.242368000  | -2.493671000 | 2.766995000  |
|  | H | -9.862670000  | -1.174701000 | 3.760788000  |
|  | H | -8.255282000  | 0.245628000  | 4.337456000  |
|  | H | -6.599759000  | 0.736330000  | 4.012081000  |
|  | H | -7.942443000  | 1.635816000  | 3.305186000  |
|  | N | -4.448701000  | -0.029822000 | 1.885147000  |
|  | C | -3.144022000  | 0.215181000  | 2.467259000  |
|  | C | -2.141649000  | 0.573910000  | 1.359314000  |



|  |   |              |              |              |
|--|---|--------------|--------------|--------------|
|  | O | -1.522671000 | 1.640998000  | 1.385440000  |
|  | C | -2.779640000 | -1.038825000 | 3.285845000  |
|  | C | -3.718296000 | -1.150215000 | 4.487786000  |
|  | C | -1.329203000 | -1.018756000 | 3.742391000  |
|  | H | -4.575304000 | -0.958107000 | 1.491416000  |
|  | H | -3.218062000 | 1.094966000  | 3.114071000  |
|  | H | -2.944377000 | -1.902237000 | 2.639359000  |
|  | H | -1.152836000 | -1.882020000 | 4.370107000  |
|  | H | -0.674572000 | -1.035110000 | 2.883299000  |
|  | H | -1.133114000 | -0.119381000 | 4.319028000  |
|  | H | -3.540991000 | -2.080511000 | 5.017137000  |
|  | H | -4.762573000 | -1.129731000 | 4.185180000  |
|  | H | -3.558232000 | -0.329504000 | 5.184151000  |
|  | N | -2.003242000 | -0.349804000 | 0.409111000  |
|  | C | -1.234407000 | -0.167844000 | -0.810639000 |
|  | C | -1.233447000 | 1.284252000  | -1.280800000 |
|  | O | -0.187555000 | 1.854229000  | -1.614650000 |
|  | C | -1.828871000 | -0.996061000 | -1.959088000 |
|  | C | -1.527353000 | -2.490544000 | -1.817622000 |
|  | C | -2.155345000 | -3.247868000 | -2.965758000 |
|  | N | -1.581410000 | -3.067877000 | -4.153540000 |
|  | O | -3.128507000 | -3.989344000 | -2.812681000 |
|  | H | -2.625822000 | -1.156504000 | 0.414791000  |
|  | H | -0.189016000 | -0.460963000 | -0.655602000 |
|  | H | -1.405488000 | -0.630554000 | -2.898650000 |
|  | H | -2.904032000 | -0.818862000 | -1.995105000 |
|  | H | -0.452126000 | -2.629053000 | -1.878245000 |
|  | H | -1.919033000 | -2.867319000 | -0.876609000 |
|  | H | -1.972093000 | -3.511334000 | -4.968520000 |
|  | H | -0.794324000 | -2.438257000 | -4.294111000 |
|  | N | -2.434103000 | 1.851565000  | -1.316389000 |
|  | C | -2.709910000 | 3.247785000  | -1.598955000 |
|  | C | -1.451745000 | 4.105033000  | -1.420281000 |
|  | O | -1.046128000 | 4.827140000  | -2.327848000 |
|  | C | -3.838015000 | 3.660143000  | -0.645023000 |
|  | C | -4.191495000 | 5.143465000  | -0.696298000 |
|  | C | -5.428969000 | 5.424846000  | 0.174136000  |
|  | N | -5.320286000 | 4.812495000  | 1.479297000  |
|  | C | -4.599235000 | 5.254849000  | 2.507480000  |
|  | N | -4.159129000 | 6.508569000  | 2.576071000  |
|  | N | -4.337727000 | 4.403510000  | 3.490017000  |
|  | H | -3.266850000 | 1.289017000  | -1.145053000 |
|  | H | -3.018095000 | 3.377798000  | -2.645620000 |
|  | H | -4.715867000 | 3.065721000  | -0.905724000 |
|  | H | -3.530098000 | 3.393036000  | 0.366341000  |
|  | H | -4.403590000 | 5.447145000  | -1.722318000 |
|  | H | -3.340475000 | 5.735831000  | -0.356715000 |
|  | H | -6.310897000 | 5.001568000  | -0.308333000 |
|  | H | -5.589251000 | 6.501030000  | 0.259643000  |
|  | H | -5.537074000 | 3.817950000  | 1.516223000  |
|  | H | -4.374055000 | 7.173951000  | 1.856280000  |
|  | H | -3.673392000 | 6.834872000  | 3.392786000  |
|  | H | -4.656706000 | 3.449460000  | 3.385421000  |
|  | H | -3.908905000 | 4.703124000  | 4.347865000  |

|  |   |              |              |              |
|--|---|--------------|--------------|--------------|
|  | N | -0.913425000 | 4.069331000  | -0.191846000 |
|  | C | 0.387610000  | 4.643417000  | 0.080309000  |
|  | C | 1.477665000  | 3.569620000  | 0.180351000  |
|  | O | 2.568045000  | 3.681491000  | -0.391535000 |
|  | C | 0.374247000  | 5.468671000  | 1.387983000  |
|  | C | 1.742599000  | 6.111631000  | 1.606803000  |
|  | C | -0.739505000 | 6.520049000  | 1.324630000  |
|  | C | -0.821047000 | 7.384265000  | 2.578948000  |
|  | H | -1.250751000 | 3.357752000  | 0.453781000  |
|  | H | 0.638064000  | 5.291350000  | -0.767323000 |
|  | H | 0.168879000  | 4.785921000  | 2.217337000  |
|  | H | -0.576156000 | 7.156852000  | 0.450922000  |
|  | H | -1.688868000 | 6.003421000  | 1.182866000  |
|  | H | -1.672067000 | 8.056008000  | 2.512966000  |
|  | H | -0.915645000 | 6.763081000  | 3.464287000  |
|  | H | 0.067805000  | 8.000018000  | 2.686140000  |
|  | H | 1.814490000  | 6.546644000  | 2.598698000  |
|  | H | 1.916817000  | 6.896019000  | 0.871519000  |
|  | H | 2.541967000  | 5.383191000  | 1.498064000  |
|  | N | 1.203489000  | 2.566265000  | 1.011789000  |
|  | C | 2.215163000  | 1.626374000  | 1.447995000  |
|  | C | 2.936533000  | 0.944278000  | 0.302815000  |
|  | O | 4.063907000  | 0.471186000  | 0.505334000  |
|  | C | 1.583978000  | 0.566473000  | 2.362635000  |
|  | C | 2.612739000  | -0.175674000 | 3.222617000  |
|  | C | 1.965151000  | -1.398514000 | 3.870259000  |
|  | C | 2.960167000  | -2.325960000 | 4.558952000  |
|  | N | 2.274342000  | -3.618861000 | 4.756686000  |
|  | H | 0.248729000  | 2.385636000  | 1.317214000  |
|  | H | 2.989965000  | 2.182851000  | 1.993821000  |
|  | H | 1.047623000  | -0.132466000 | 1.724256000  |
|  | H | 0.871165000  | 1.078559000  | 3.007060000  |
|  | H | 3.450214000  | -0.480673000 | 2.598762000  |
|  | H | 3.011456000  | 0.507865000  | 3.974267000  |
|  | H | 1.229397000  | -1.049093000 | 4.588952000  |
|  | H | 1.480934000  | -1.970312000 | 3.086469000  |
|  | H | 3.293910000  | -1.901947000 | 5.504850000  |
|  | H | 3.835836000  | -2.482855000 | 3.935328000  |
|  | H | 2.822593000  | -4.236815000 | 5.352561000  |
|  | H | 1.354712000  | -3.447725000 | 5.165591000  |
|  | H | 2.226843000  | -4.128037000 | 3.855271000  |
|  | N | 2.278628000  | 0.762482000  | -0.841072000 |
|  | C | 2.923672000  | 0.141136000  | -1.975242000 |
|  | C | 4.297812000  | 0.698943000  | -2.272342000 |
|  | O | 5.162040000  | -0.020158000 | -2.846876000 |
|  | C | 2.072517000  | 0.194720000  | -3.247141000 |
|  | C | 1.354651000  | -1.154435000 | -3.556466000 |
|  | O | 1.590113000  | -2.128359000 | -2.826867000 |
|  | O | 0.558718000  | -1.143996000 | -4.519005000 |
|  | H | 1.389364000  | 1.237987000  | -1.025529000 |
|  | H | 3.089257000  | -0.933365000 | -1.759856000 |
|  | H | 2.695415000  | 0.406531000  | -4.120194000 |
|  | H | 1.319225000  | 0.981980000  | -3.191913000 |
|  | N | 4.575596000  | 1.954557000  | -1.918948000 |

|  |   |              |              |              |
|--|---|--------------|--------------|--------------|
|  | C | 5.923321000  | 2.483444000  | -1.971563000 |
|  | C | 6.959057000  | 1.470011000  | -1.431103000 |
|  | O | 8.038246000  | 1.293968000  | -1.997551000 |
|  | C | 5.985130000  | 3.760940000  | -1.119583000 |
|  | C | 7.408063000  | 4.215524000  | -0.960384000 |
|  | C | 8.059763000  | 4.868405000  | -1.998308000 |
|  | C | 8.109472000  | 3.947576000  | 0.207531000  |
|  | C | 9.435557000  | 4.319544000  | 0.334726000  |
|  | C | 10.078596000 | 4.964677000  | -0.707500000 |
|  | C | 9.386286000  | 5.240209000  | -1.874482000 |
|  | H | 3.858145000  | 2.547738000  | -1.500795000 |
|  | H | 6.221990000  | 2.692593000  | -3.006893000 |
|  | H | 5.553203000  | 3.545583000  | -0.142227000 |
|  | H | 5.387003000  | 4.533536000  | -1.604836000 |
|  | H | 7.527152000  | 5.082743000  | -2.914027000 |
|  | H | 7.615219000  | 3.437804000  | 1.020360000  |
|  | H | 9.974213000  | 4.101923000  | 1.245065000  |
|  | H | 11.116226000 | 5.249653000  | -0.614391000 |
|  | H | 9.883918000  | 5.741494000  | -2.692021000 |
|  | N | 6.603923000  | 0.911491000  | -0.274234000 |
|  | C | 7.354534000  | -0.113390000 | 0.443753000  |
|  | C | 7.060679000  | -1.485797000 | -0.147816000 |
|  | O | 7.962642000  | -2.202755000 | -0.652172000 |
|  | C | 6.958623000  | -0.012517000 | 1.926721000  |
|  | C | 7.335171000  | -1.234288000 | 2.772914000  |
|  | C | 8.851178000  | -1.409956000 | 2.847502000  |
|  | C | 6.732505000  | -1.095343000 | 4.170672000  |
|  | H | 5.619227000  | 0.972053000  | 0.007860000  |
|  | H | 8.421989000  | 0.075588000  | 0.280654000  |
|  | H | 7.439803000  | 0.872991000  | 2.343740000  |
|  | H | 5.878687000  | 0.131349000  | 1.970084000  |
|  | H | 6.937690000  | -2.133464000 | 2.287626000  |
|  | H | 9.116933000  | -2.244672000 | 3.496269000  |
|  | H | 9.334064000  | -0.513125000 | 3.230287000  |
|  | H | 9.266211000  | -1.623045000 | 1.860008000  |
|  | H | 6.917893000  | -1.996309000 | 4.748150000  |
|  | H | 7.200697000  | -0.260805000 | 4.685824000  |
|  | H | 5.665762000  | -0.914642000 | 4.101974000  |
|  | N | 5.730912000  | -1.856474000 | -0.168525000 |
|  | C | 5.355463000  | -3.289306000 | 0.015907000  |
|  | C | 6.120166000  | -4.143492000 | -0.943592000 |
|  | O | 6.662136000  | -5.271250000 | -0.656457000 |
|  | C | 3.841330000  | -3.426907000 | -0.237163000 |
|  | C | 2.959423000  | -2.681665000 | 0.762284000  |
|  | C | 1.481134000  | -2.874774000 | 0.398652000  |
|  | N | 1.095981000  | -4.247650000 | 0.622287000  |
|  | C | 1.040538000  | -5.198846000 | -0.298717000 |
|  | N | 0.894200000  | -6.450613000 | 0.153720000  |
|  | N | 0.913310000  | -4.938305000 | -1.603654000 |
|  | H | 5.126314000  | -1.218754000 | 0.356467000  |
|  | H | 5.624934000  | -3.596390000 | 1.037005000  |
|  | H | 3.675312000  | -3.069695000 | -1.272098000 |
|  | H | 3.613502000  | -4.491657000 | -0.220179000 |
|  | H | 3.194603000  | -1.626313000 | 0.719438000  |

|  |   |             |              |              |
|--|---|-------------|--------------|--------------|
|  | H | 3.139933000 | -3.090955000 | 1.752070000  |
|  | H | 0.865128000 | -2.259643000 | 1.051063000  |
|  | H | 1.324823000 | -2.554900000 | -0.628080000 |
|  | H | 1.388904000 | -4.579979000 | 1.548907000  |
|  | H | 0.885220000 | -7.215741000 | -0.497017000 |
|  | H | 1.233574000 | -6.627213000 | 1.093056000  |
|  | H | 0.881827000 | -5.691855000 | -2.265928000 |
|  | H | 1.155718000 | -4.037431000 | -1.988120000 |
|  | N | 6.205660000 | -3.584972000 | -2.280009000 |
|  | H | 6.292302000 | -4.322951000 | -2.973879000 |
|  | H | 7.080741000 | -3.036697000 | -2.309599000 |
